# Supplementary material for: Formation of atmospheric molecular clusters containing nitric acid with ammonia, methylamine, and dimethylamine
Source: Royal Society of Chemistry journal article supplement (doi:10.1039/d4em00330f), 2024-01-01
Supplement: d4em00330f1.pdf [file d4em00330f1.pdf]

1 **Formation of atmospheric molecular clusters consisting of nitric acid**

2 **with ammonia, methylamine, and dimethylamine**

3

4 Dong-Ping Chen\*, Wen Ma, Chun-Hong Yang, Ming Li, Zhao-Zhen Zhou, Yang Zhang, Xi-Cun

5 Wang\*, Zheng-Jun Quan\*

6

7 31 pages, 11 figures, and 6 tables

8 Contents

|    |                                          |    |
|----|------------------------------------------|----|
| 9  | 1. ACDC model .....                      | 2  |
| 10 | 2. AIM analysis .....                    | 3  |
| 11 | 3. NCI analysis.....                     | 4  |
| 12 | 4. Average partial charge ( $\delta_A$ ) |    |
| 13 | analysis.....                            | 5  |
| 14 | 5. Boundary condition .....              | 6  |
| 15 | 6. Stability of clusters.....            | 7  |
| 16 | 7. Hydration free energies. ....         | 7  |
| 17 | 8. Figure S1.....                        | 9  |
| 18 | 9. Figure S2.....                        | 11 |
| 19 | 10. Figure S3.....                       | 11 |
| 20 | 11. Figure S4.....                       | 12 |
| 21 | 12. Figure S5.....                       | 12 |
| 22 | 13. Figure S6.....                       | 12 |
| 23 | 14. Figure S7.....                       | 13 |
| 24 | 15. Figure S8.....                       | 13 |
| 25 | 16. Figure S9.....                       | 17 |
| 26 | 17. Figure S10.....                      | 18 |

27

28

29

30 **ACDC model.** ACDC program is used to compute the time evolution of evaporation  
31 rates, formation rates, and growth paths of the atmospheric clusters. The code can be  
32 used to solve the birth–death equations with calculated free energies (based on the  
33 QM method) as the inputs. The overall process accounts for all possible collisions and  
34 evaporation of the relevant clusters. Specifically, the birth–death equation is written  
35 as molecular clusters were calculated by considering the detailed balance in the  $i + j$   
36 reactions,<sup>[1]</sup> where  $i$  or  $j$  can be either single molecules or molecular clusters. In  
37 equilibrium, the evaporation rate is equal to the cluster formation rate:

$$38 \quad i + j \rightleftharpoons (i + j) \quad 1$$

$$39 \quad \gamma C_{i+j} = \beta_{ij} C_i C_j \quad 2$$

40 Where  $\gamma$  is the evaporation rate of  $i$  or  $j$  from  $i + j$ ,  $\beta_{ij}$  is the collision rate of  $i$  with  
41  $j$ , which gives the probability that the collision finally results in an  $i + j$  reaction. The  
42 collision rate  $\beta_{ij}$  can be determined from kinetic gas theory as <sup>[2]</sup>:

$$43 \quad \beta_{ij} = \left( \frac{3}{4\pi} \right)^{1/6} \left[ 6k_B T \left( \frac{1}{m_i} + \frac{1}{m_j} \right) \right]^{1/2} \left( V_i^{1/3} + V_j^{1/3} \right)^2 \quad 3$$

44 Where  $m_i$  and  $m_j$  are the masses of  $i$  and  $j$ , and  $V_i$  and  $V_j$  are their respective  
45 volumes.

46 Concentrations  $C_{i+j}$ ,  $C_i$ , and  $C_j$  are related by the equilibrium constant:

$$47 \quad K = \frac{C_{i+j}}{C_i C_j} = \frac{k_B T}{P_{ref}} \exp \left( \frac{-\Delta G_{rea}}{k_B T} \right) \quad 4$$

48 Where  $P_{ref}$  is the reference pressure and  $\Delta G_{real}$  is the Gibbs free energy of the  $i +$   
49  $j$  reaction. Combining the equations above, we can get an expression for the  
50 evaporation rate of  $i$  or  $j$  from the cluster  $i + j$ :

$$51 \quad \gamma = \beta_{ij} \frac{P_{ref}}{k_B T} \exp \left( \frac{\Delta G_{i+j} - \Delta G_i - \Delta G_j}{k_B T} \right) \quad 5$$

52 Where  $\Delta G_{i+j}$ ,  $\Delta G_i$ , and  $\Delta G_j$  are the Gibbs free energies of the formation of  
53 clusters  $i + j$ ,  $i$ , and  $j$  at the reference pressure ( $P_{ref}$ ) of 101.3 kPa. In this study,  $i$  and  $j$

54 are the monomer molecules to form  $i + j$  clusters and the corresponding  $\Delta G_i$  or  $\Delta G_j$   
 55 then equals zero.

$$56 \quad J = \frac{dc_i}{dt} = \frac{1}{2} \sum_{j < i} \beta_{j,(i-j)} c_j c_{(i-j)} + \sum_j \gamma_{(i+j) \rightarrow i} c_{(i+j)} - \sum_j \beta_{i,j} c_j - \frac{1}{2} \sum_{j < i} \gamma_{i \rightarrow j} c_i + Q_i - S_i \quad 6$$

57 where  $J$  refers to the cluster formation rate,  $Q_i$ , set to be zero in the present study,  
 58 is the possible other source of  $i$ .  $S_i$  represents the sink term of  $i$ .

59 **AIM analysis.** Atoms in Molecules (AIM) theory has been regarded as one of the  
 60 most efficient tools to explore intermolecular interactions, such as hydrogen bonds.<sup>[3-8]</sup>  
 61 In this study, the topological analysis of electron density at bond critical points  
 62 ( $BCPs$ ), which provides evidence for the existence of the hydrogen bonds and  
 63 deepens the nature of the intermolecular hydrogen bond in the clusters, is analyzed  
 64 with the AIM methodology to discuss the interactions between the NA with R1NHR2.

65 For the investigation of the topological characteristics at  $BCPs$ , the electron  
 66 density ( $\rho$ ), its Laplacian ( $\nabla^2\rho$ ), the electronic energy density ( $H$ ), the electronic  
 67 kinetic energy density ( $G$ ), and the electronic potential energy density ( $V$ ) are  
 68 presented in Table S1. As shown in Table S1, the electronic densities in  
 69 intermolecular hydrogen bonds are from 0.0664 to 0.0936 a.u., for the (NA)(R1NHR2)  
 70 dimers, which are in the accepted range. The value of electronic density indicates the  
 71 strength of the hydrogen bond.<sup>[8,9]</sup> The larger the value of  $\rho$ , the stronger the hydrogen  
 72 bond is. From Table 1, we found that the order of the  $\rho$  value for the dimers is  
 73 (NA)(DMA) > (NA)(MA) > (NA)(NH<sub>3</sub>) > (NA)<sub>2</sub> > (DMA)<sub>2</sub> > (MA)<sub>2</sub> > (NH<sub>3</sub>)<sub>2</sub>, which  
 74 is consistent with the O-H...N bond length in dimers (see Figure S2). Their  
 75 corresponding positive  $\nabla^2\rho$  values imply the closed-shell system interactions in all  
 76 dimers, which are hydrogen bonding, ionic interactions, or van der Waals forces,  
 77 rather than a covalent bond. Their values of  $\nabla^2\rho$  are also in the general range for a  
 78 hydrogen bond.<sup>[10, 11]</sup> The strongest and weakest hydrogen bonds are found in the  
 79 (NA)(DMA) and (NH<sub>3</sub>)<sub>2</sub> dimers, respectively. Furthermore, the electronic energy  
 80 density ( $H$ ) is viewed as an important index to explore the non-covalent interaction.  
 81 The positive  $H$  values show that these dimers are electrostatic in closed-shell system  
 82 interactions, while the interaction is predominantly covalent in the case of  $H < 0$ . The

83 value of  $-G/V$  is used to determine whether the regions correspond to covalent or  
84 noncovalent interactions. The  $-G/V$  values are larger than 1 in Table 1, showing that  
85 the interaction for all dimers is noncovalent. On the other hand, the smaller the value  
86 of  $-G/V$ , the stronger the hydrogen bond is. Thus, the intermolecular hydrogen bond  
87 interaction between NA and DMA is the strongest.

88 **NCI analysis.** The non-covalent interaction (NCI) index, which is based on the  
89 relationship between the electron density and the reduced density gradient, has been  
90 mentioned as an extension of AIM by Yang and coworkers.<sup>[7]</sup> As a fundamental  
91 dimensionless quantity in DFT, the reduced density gradient (*RDG*) was calculated to  
92 reveal the deviation from a homogeneous electron distribution:

$$93 \quad RDG = \frac{1}{2(3\pi^2)^{1/3}} \frac{|\nabla\rho|}{\rho^{4/3}}$$

94 Where  $\nabla$  is the gradient operator and  $|\nabla\rho|$  is the electronic density gradient  
95 mode. According to previous studies, the NCI index is a practical tool to identify and  
96 visualize the noncovalent interactions as regions of real space. Therefore, it is useful  
97 to compare the ability of intermolecular hydrogen bond interactions between NA and  
98 R<sub>1</sub>NHR<sub>2</sub>.

99 Plots of the RDG vs. the electron density ( $\rho$ ) multiplied by the sign of the second  
100 Hessian eigenvalue ( $\lambda_2$ ) for the (NA)<sub>2</sub>, (NH<sub>3</sub>)<sub>2</sub>, (MA)<sub>2</sub>, (DMA)<sub>2</sub>, (NA)(NH<sub>3</sub>)<sub>2</sub>,  
101 (NA)(MA), and (NA)(DMA) dimers are shown in **Figure S3** and **Figure 2** using the  
102 Multiwfn program<sup>[12]</sup>. The reduced gradient spikes in the low densities indicate the  
103 existence of the stabilizing interactions of noncovalent bonding. For the (NA)<sub>2</sub> cluster,  
104 there is only one low-reduced gradient spike at low density of the  $\text{sign}(\lambda_2)\rho$  value of -  
105 0.038 a.u., showing a stable and stronger hydrogen bond interaction. From the (NH<sub>3</sub>)<sub>2</sub>  
106 to (MA)<sub>2</sub>, and to (DMA)<sub>2</sub> clusters, there are only one, three, and two low-reduced  
107 gradient spikes at low density of the  $\text{sign}(\lambda_2)\rho$  value of -0.012, -0.0065, -0.0085,  
108 -0.015, -0.008. and -0.012 a.u., respectively, showing the relatively stable van der  
109 Waals force interactions in the interior of these homogeneous clusters. For the  
110 (NA)(NH<sub>3</sub>) dimer, there are two low-reduced gradient spikes at low density of the  
111  $\text{sign}(\lambda_2)\rho$  value of -0.012 and -0.068 a.u., showing a stable van der Waals force and a

112 stronger hydrogen bond interaction between NA and NH<sub>3</sub>, respectively. For the  
113 (NA)(MA) dimer, there are two low-reduced gradient spikes at low density of the  
114  $\text{sign}(\lambda_2)\rho$  value of  $-0.008$  and  $-0.081$  a.u., showing a stable van der Waals force and a  
115 stronger hydrogen bond interaction between NA and MA. For the (NA)(DMA) dimer,  
116 there are also two low-reduced gradient spikes at low density of the  $\text{sign}(\lambda_2)\rho$  value of  
117  $-0.008$  and  $-0.092$  a.u., showing a stable van der Waals force and a stronger hydrogen  
118 bond interaction between NA and DMA. From the (NA)(NH<sub>3</sub>) to (NA)(MA), and to  
119 (NA)(DMA) dimers, the characteristic peaks directed toward the  $\text{sign}(\lambda_2)\rho$  values are  
120 very near zero, which are  $-0.068$ ,  $-0.081$  and  $-0.092$  a.u., respectively, indicative of  
121 the relatively stronger hydrogen bond interactions between the NA and the NH<sub>3</sub>, MA  
122 or DMA. The characteristic peaks directed toward  $\text{sign}(\lambda_2)\rho$  values larger, then the  
123 hydrogen bond interaction is weaker, therefore, the hydrogen bond interactions  
124 become stronger from the (NA)(DMA) to (NA)(MA), and to (NA)(NH<sub>3</sub>) clusters.  
125 **Figure 2** also shows that there exists a bonding isosurface between the middle region  
126 of the NA and NH<sub>3</sub>, MA, or DMA. From the (NA)(NH<sub>3</sub>), to (NA)(MA), and to  
127 (NA)(DMA), the color coding of these bonding isosurfaces is from green to blue,  
128 which demonstrates that the stability order of the hydrogen bonding interactions for  
129 different dimers is (NA)(DMA) > (NA)(MA) > (NA)(NH<sub>3</sub>) > (NA)<sub>2</sub> > (DMA)<sub>2</sub> >  
130 (MA)<sub>2</sub> > (NH<sub>3</sub>)<sub>2</sub>. The reduced gradient isosurface ( $s = 0.05$  a.u.) obtained by the VMD  
131 program.<sup>[13]</sup>

132 **Average partial charge ( $\delta_A$ ) analysis.** In acid–base particles, proton transfer from  
133 the acid moiety to the base moiety may take place easily, depending on the strengths  
134 of the acid and the base. The proton transfer considered here is for the equilibrium  
135 structure of the cluster. We define proton transfer to occur in the present context if the  
136 average partial charges ( $\delta_A$ ) on the acid and base moieties are at least of magnitude  
137 0.5. (In fact, for the systems studied the typical values of  $\delta_A$  in the case of proton  
138 transfer are of the order of  $0.8 \sim 0.9$ ; there are no borderline cases; In this article,  $\delta_A$   
139 refers to the average partial charge on the base groups). The average partial charges  
140 ( $\delta_A$ ) at M06-2X/6-31++G(d,p) level were calculated using natural bond orbital (NBO)  
141 analysis.<sup>14, 15</sup>

142 For the most stable structure  $(\text{NA})_n(\text{R}_1\text{NHR}_2)_m$  ( $1 \leq m, n \leq 4$ ) clusters, except  
 143  $(\text{NA})(\text{R}_1\text{NHR}_2)$  and  $(\text{NA})(\text{NH}_3)_2$  clusters in **Table S2**, all protons are complete  
 144 transferred from NA to  $\text{R}_1\text{NHR}_2$ . In  $(\text{NA})(\text{NH}_3)$ ,  $(\text{NA})(\text{MA})$ ,  $(\text{NA})(\text{DMA})$  and  
 145  $(\text{NA})(\text{NH}_3)_2$  clusters, a pronounced proton transfer was not involved ( $\delta_A = 0.116$ ,  
 146  $0.137$ ,  $0.157$  and  $0.169$ , respectively), thus ion pair  $(\text{NO}_3)^-(\text{R}_1\text{NHR}_2)^+$  are not formed  
 147 which can be deduced by both the proton location and the average partial charge. The  
 148 small  $\delta$  value in this case ( $\delta_A < 0.2$ ) does not correspond to proton transfer. In other  
 149 clusters, there are one or more hydrogen bonds connecting NA to  $\text{R}_1\text{NHR}_2$ , in which  
 150 NA acts as the hydrogen-bond donor, and  $\text{R}_1\text{NHR}_2$  is the acceptor. The occurrence of  
 151 proton transfer affects the binding energy since the proton-transfer complexes are  
 152 bonded ionically, rather than by (neutral) hydrogen bonding. For  $(\text{NA})_m(\text{R}_1\text{NHR}_2)$  ( $m$   
 153  $= 2 \sim 4$ ) and  $(\text{NA})(\text{R}_1\text{NHR}_2)_n$  ( $n = 2 \sim 4$ ) clusters except for  $(\text{NA})(\text{NH}_3)_2$  cluster, the  
 154 average partial charge  $\delta_A$  on  $\text{R}_1\text{NHR}_2$  is in a range of  $0.804 \sim 0.891$ . From  $\text{NH}_3$  to  
 155  $\text{DMA}$ ,  $\delta_A$  is increased gradually. The same as above, for  $(\text{NA})_m(\text{R}_1\text{NHR}_2)_n$  ( $2 \leq m, n \leq$   
 156  $4$ ) clusters, the average partial charge  $\delta_A$  on  $\text{R}_1\text{NHR}_2$  is in a range of  $0.807 \sim 0.890$ .  
 157 Larger  $\delta_A$  values ( $> 0.8$ ) indicate that protons on NA are completely transferred to  
 158  $\text{R}_1\text{NHR}_2$  molecules and it also means that hydrogen bonds and electrostatic forces  
 159 become stronger, which are conducive to the stability of clusters. This stability against  
 160 dissociation is favorable for particle growth.

161 **Boundary condition.** The boundary conditions require that the outgrowing clusters  
 162 are stable enough and the clusters are more likely to grow than to evaporate. For  
 163  $(\text{NA})_m(\text{R}_1\text{NHR}_2)_n$  ( $0 \leq m, n \leq 4$ ) clusters, the clusters with approximately equal  
 164 numbers of acid and base molecules or number of acid molecules one greater than that  
 165 of  $\text{R}_1\text{NHR}_2$  molecules have low evaporation rates and high concentrations in the  
 166 simulations. This allows us to assume that  $(\text{NA})_5(\text{R}_1\text{NHR}_2)_5$  and  $(\text{NA})_4(\text{R}_1\text{NHR}_2)_5$  are  
 167 stable enough and do not evaporate. Therefore, in the ACDC simulation,  
 168  $(\text{NA})_5(\text{R}_1\text{NHR}_2)_5$  and  $(\text{NA})_4(\text{R}_1\text{NHR}_2)_5$  that can be formed via a collision between  
 169 small clusters or evaporation from larger clusters in the simulation are allowed to  
 170 leave the simulation box. Similarly, for  $(\text{SA})_m(\text{NH}_3)_n$  ( $0 \leq m, n \leq 4$ ),  $(\text{SA})_m(\text{MA})_n$  ( $0 \leq$   
 171  $m, n \leq 3$ ) and  $(\text{SA})_m(\text{DMA})_n$  ( $0 \leq m, n \leq 4$ ),  $(\text{SA})_5(\text{NH}_3)_5$  and  $(\text{SA})_4(\text{NH}_3)_5$ ,

172 (SA)<sub>4</sub>(MA)<sub>4</sub> and (SA)<sub>3</sub>(MA)<sub>4</sub>, and (SA)<sub>5</sub>(DMA)<sub>5</sub> (SA)<sub>4</sub>(DMA)<sub>5</sub> are allowed to leave  
173 the simulation box. All other clusters crossing the box edge for H<sub>2</sub>SO<sub>4</sub>–NH<sub>3</sub>,  
174 H<sub>2</sub>SO<sub>4</sub>–MA, and H<sub>2</sub>SO<sub>4</sub>–DMA systems are brought back to the simulation by  
175 monomer evaporations.

176 **Stability of clusters.** In the process of acid–base cluster growth, a cluster can be  
177 considered to be stable when collisions with monomers or other clusters occur before  
178 evaporation. In other words, a cluster can be considered to be stable if its collision  
179 rate with acid, base monomer, or other clusters is higher than its evaporation rate of  
180 the cluster. In general, the collision rate constant of a cluster with acid or base  
181 monomer is of the order of 10<sup>-10</sup> cm<sup>3</sup> s<sup>-1</sup>. When the concentration of acid or base  
182 monomer is at ppt level, the collision rate of the cluster with acid or base monomer  
183 can reach about 10<sup>-1</sup> s<sup>-1</sup>. Therefore, we consider clusters with evaporation rates lower  
184 than 10<sup>-2</sup> s<sup>-1</sup> to be stable.

185 **Hydration free energies.** The calculated Gibbs free energies ( $\Delta G_{\text{ref}}$ ) of hydration at  
186 298.15 K and 1 atm are presented in **Table S5**. The corresponding enthalpy of  
187 hydration ( $\Delta H$ ) and entropy of hydration ( $\Delta S$ ) are presented in **Table S6**, and the  
188 optimized geometries are shown in **Figure S10**. As shown in **Table S5**, hydration-free  
189 energies for all pure R<sub>1</sub>NHR<sub>2</sub> and pure NA clusters are all negative. For the addition  
190 of the first water molecule, hydration-free energies for all hetero-molecular clusters  
191 (NA)<sub>m</sub>(R<sub>1</sub>NHR<sub>2</sub>)<sub>n</sub> (0 ≤ m, n ≤ 2) are negative with (NA)<sub>2</sub>(NH<sub>3</sub>)<sub>2</sub> being the most  
192 favorable one. A proton transfer is induced between the NA and R<sub>1</sub>NHR<sub>2</sub> molecules  
193 when adding water molecules to the cluster (see **Figure S2** and **Figure S10**,  
194 respectively), which explains the evaporation rate of (NA)(R<sub>1</sub>NHR<sub>2</sub>) cluster decreases  
195 with the increase of *RH*. The addition of water molecules to a cluster with an equal  
196 number of NA and R<sub>1</sub>NHR<sub>2</sub> molecules is more favorable than to other clusters. For  
197 the addition of the last H<sub>2</sub>O molecule, the hydration-free energies for all hetero-  
198 molecular clusters (NA)<sub>m</sub>(R<sub>1</sub>NHR<sub>2</sub>)<sub>n</sub> (0 ≤ m, n ≤ 2) are positive or close to zero.  
199 Hence, the addition of a last H<sub>2</sub>O molecule to any cluster is not favorable. This is  
200 consistent with previous findings that the addition of more water molecules leads to a  
201 decrease in hydration-free energies.

202 Based on the calculated hydration-free energies, the hydrate distribution of the  
 203 clusters was calculated at relative humidity (*RH*) 20%, 40%, 60%, and 80%, at 278.15  
 204 K. As shown in **Figure S11**, dry clusters for the pure  $R_1NHR_2$  cluster constitute  
 205 almost 100% of the population at all considered *RH* conditions. Therefore, pure  
 206  $R_1NHR_2$  clusters are not hydrated at atmospheric conditions. At low *RH* of 20% and  
 207 278.15 K, dry clusters are predominantly populated for the  $R_1NHR_2$  molecule and  
 208  $(R_1NHR_2)_2$  cluster, but to other hetero-molecular clusters on the contrary. With  
 209 increasing *RH*, dominant hydration distribution for NA molecule and  $(NA)_2$  cluster  
 210 gradually transfers to multi-hydrate. For  $(NA)(NH_3)$ ,  $(NA)_2(NH_3)$ ,  $(NA)(NH_3)_2$ , and  
 211  $(NA)_2(NH_3)_2$  clusters, *RH* has little effect on distribution, dominant hydration  
 212 distribution mainly tetra-hydrate, tetra-hydrate, tri-hydrate and hepta-hydrate,  
 213 respectively. Similar to above, for  $(NA)(MA)_2$ ,  $(NA)_2(MA)$ ,  $(NA)_2(MA)_2$ ,  
 214  $(NA)(DMA)$ ,  $(NA)(DMA)_2$  and  $(NA)_2(DMA)_2$  clusters dominant hydration  
 215 distribution all mainly tri-hydrate. As an exception  $(NA)_2(NH_3)_2$ ,  $(NA)(MA)$  and  
 216  $(NA)_2(DMA)$  clusters, the high-hydrate form populates more than 60% of the  
 217 distribution at all considered *RH* conditions. In addition, clusters with the last  $H_2O$   
 218 molecules have a negligible population at all considered *RH* conditions. These  
 219 findings generally show that the NA- $R_1NHR_2$  clusters are strongly hydrated,  
 220 especially for  $(NA)_2(NH_3)_2$ ,  $(NA)(MA)$ , and  $(NA)_2(DMA)$  clusters.

221

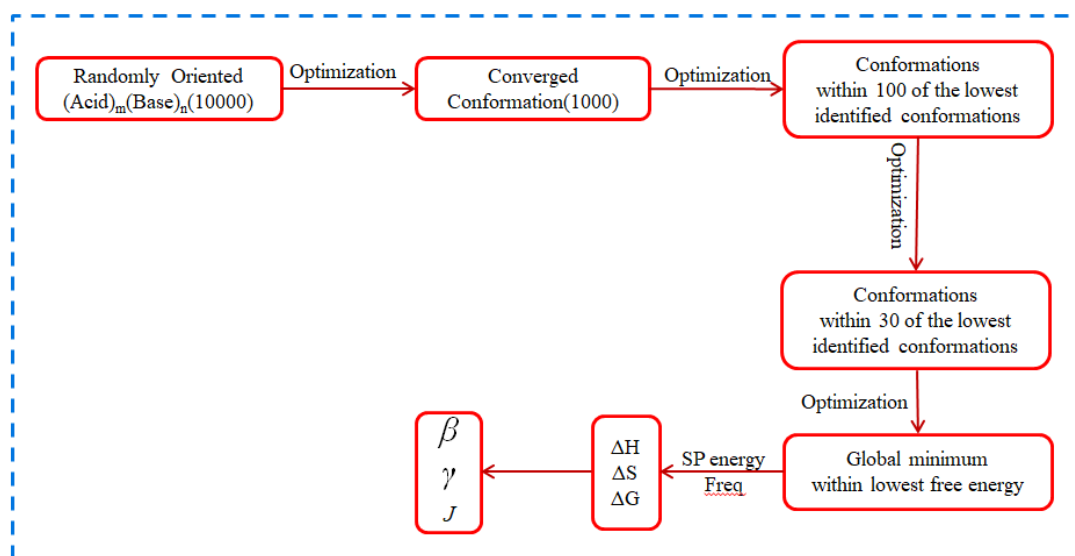



**Figure S1.** Flowchart for the multistep global minimum sampling method.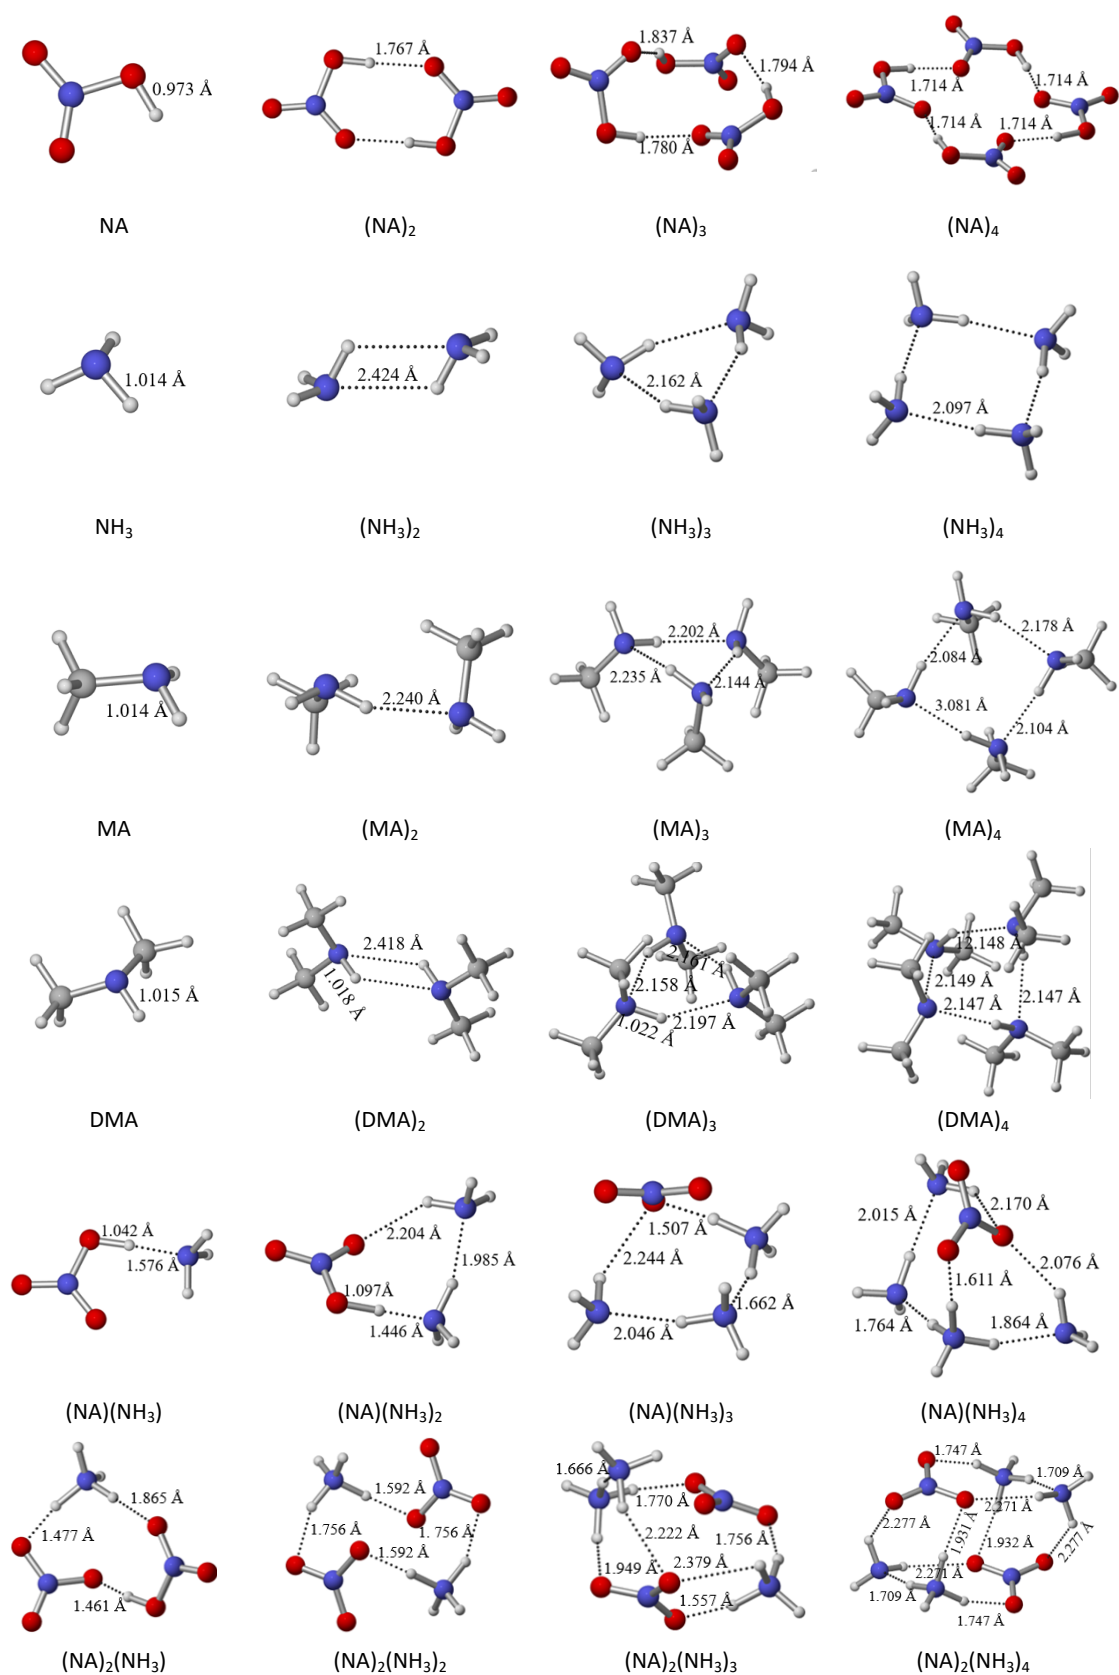

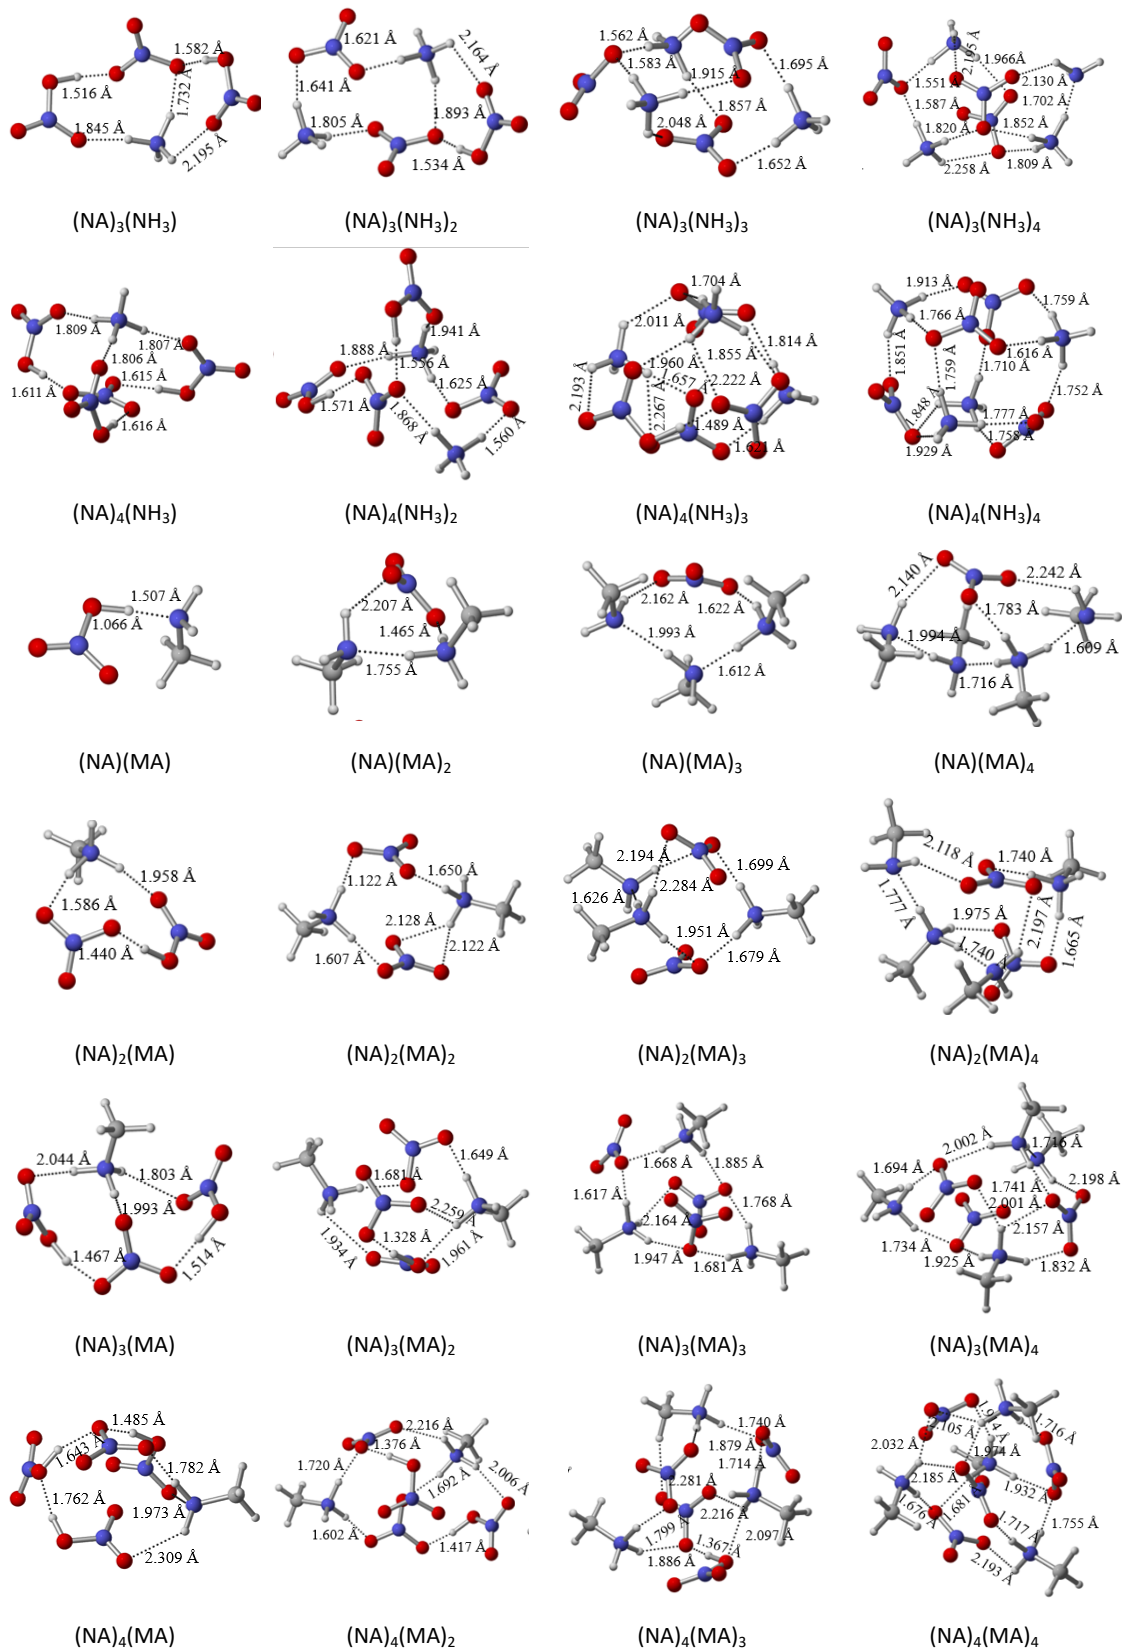

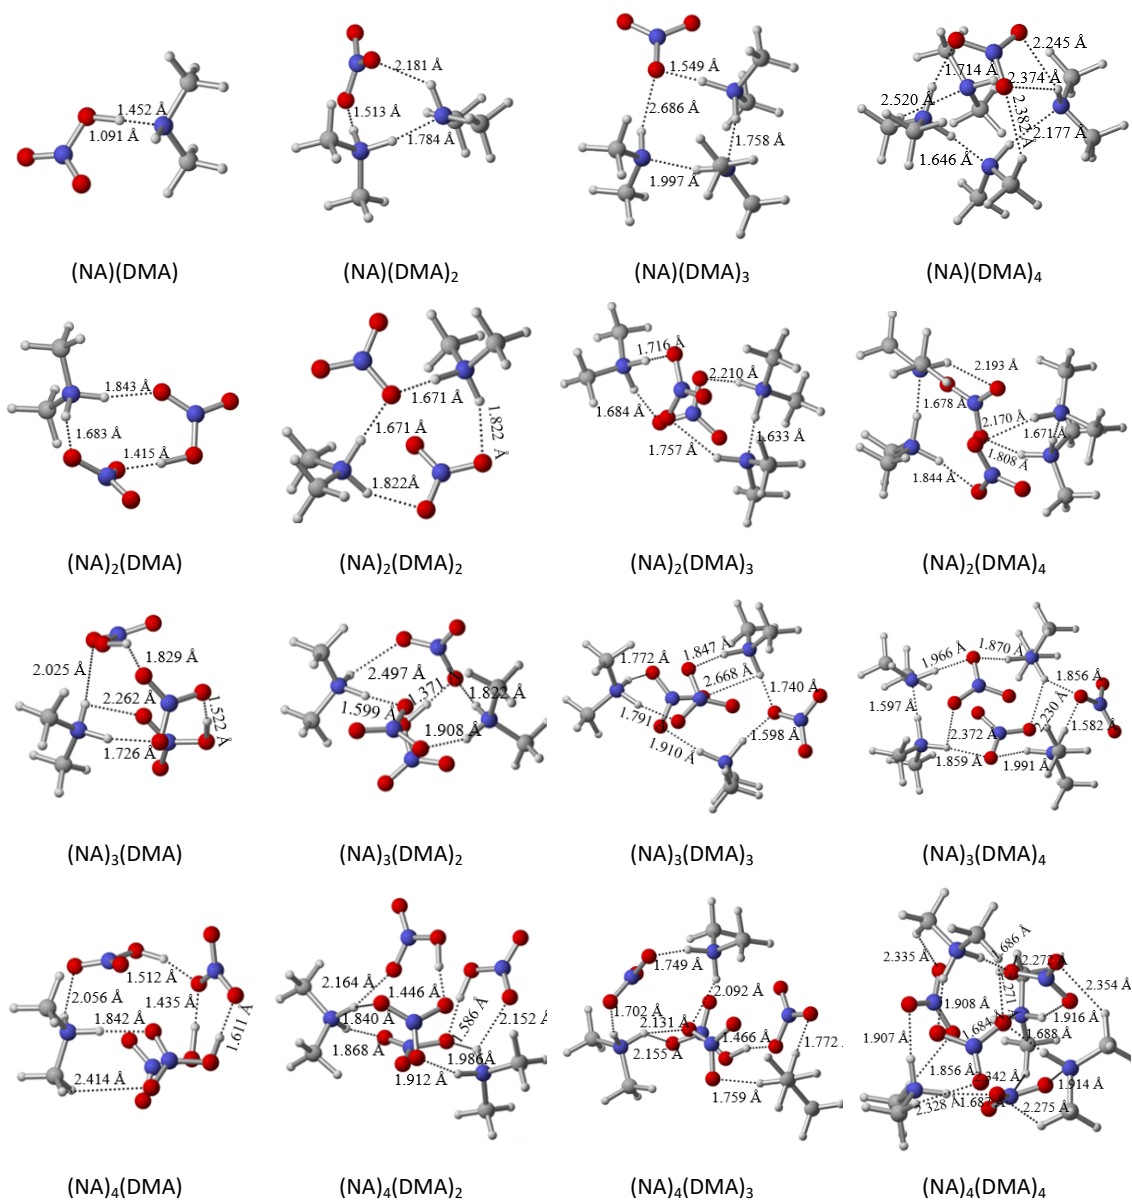

224 **Figure S2.** Optimized stable structures of dimers and  $(\text{NA})_n(\text{R}_1\text{NHR}_2)_m$  clusters ( $0 \leq m, n \leq 4$ ).  
 225 Red, blue, gray, and light gray spheres represent oxygen, nitrogen, carbon, and hydrogen atoms,  
 226 respectively. Dashed lines and numbers indicate the formation of hydrogen bonds and bond length  
 227 (in angstroms), respectively.

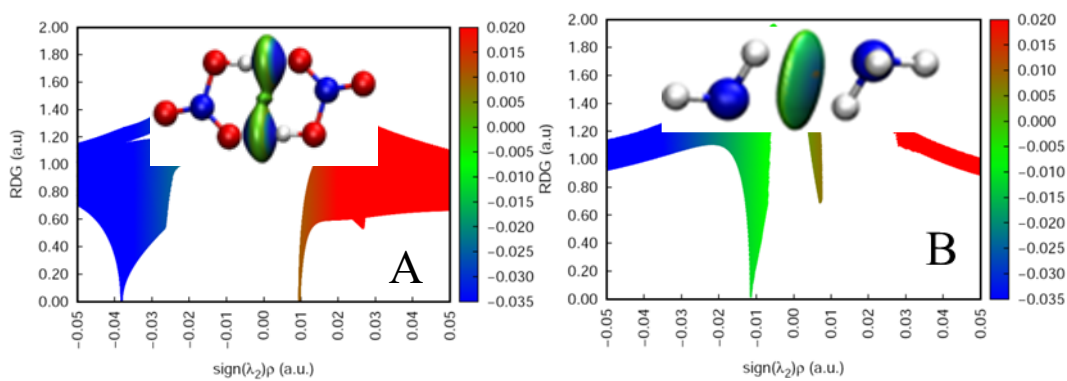

228

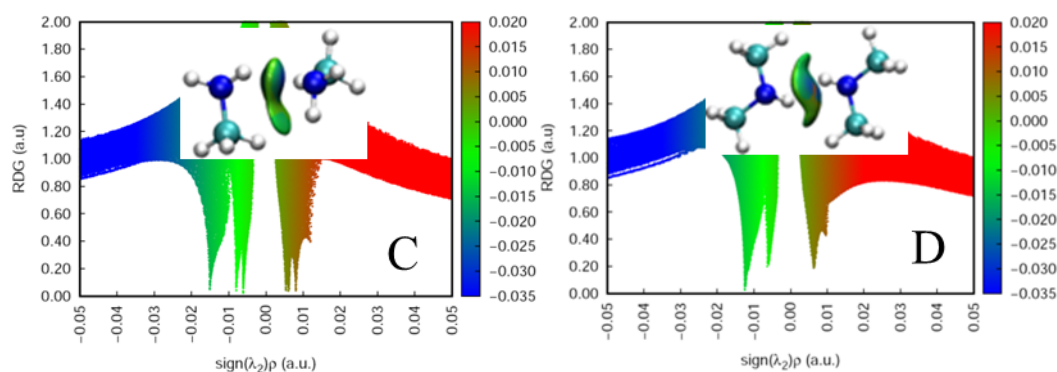

229

230 **Figure S3.** Noncovalent interactions (NCI) analysis among the global minima for (NA)<sub>2</sub> (A),

231 (NH<sub>3</sub>)<sub>2</sub> (B), (MA)<sub>2</sub> (C), (DMA)<sub>2</sub> (D).

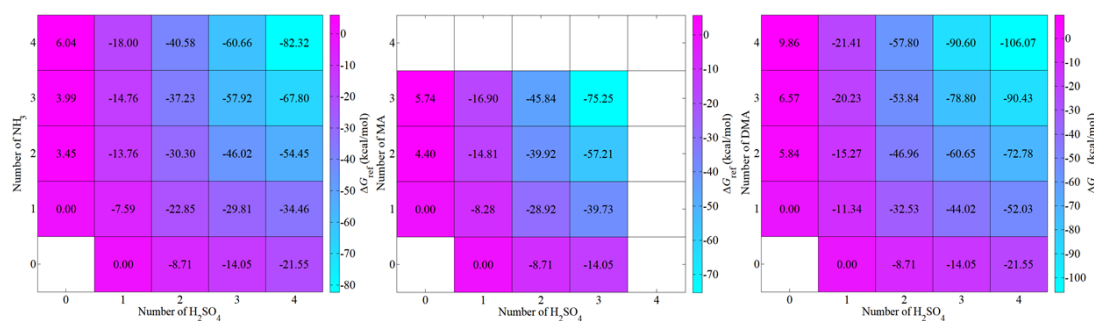

232

233 **Figure S4.** Calculated formation free energies for (SA)<sub>m</sub>(R<sub>1</sub>NHR<sub>2</sub>)<sub>n</sub> (0 ≤ m, n ≤ 3 (4), left panel

234 for NH<sub>3</sub>, middle panel for MA, right panel for DMA) at the DLPNO-CCSD(T)/ aug-cc-

235 pVTZ//M06-2X/6-31++G(d,p) level and 298.15 K and 1 atm (reference pressure of acid and base).

236

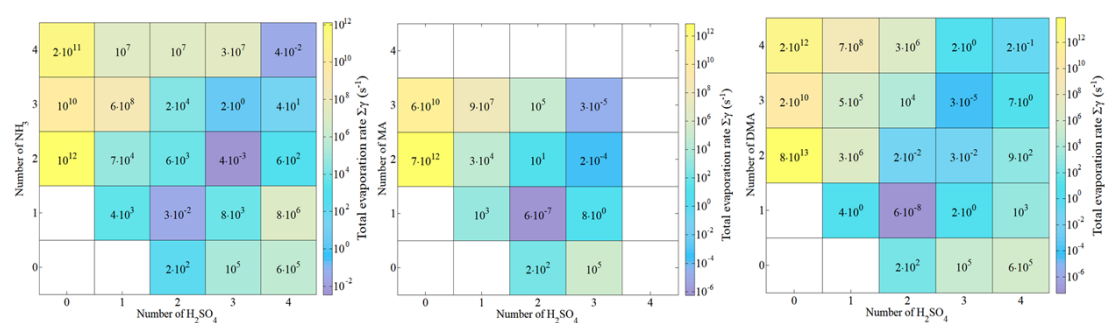

237

238 **Figure S5.** The evaporation rates for (SA)<sub>m</sub>(R<sub>1</sub>NHR<sub>2</sub>)<sub>n</sub> (0 ≤ m, n ≤ 3 (4), left panel for NH<sub>3</sub>,

239 middle panel for MA, right panel for DMA) on the base–SA grid at 278.15.

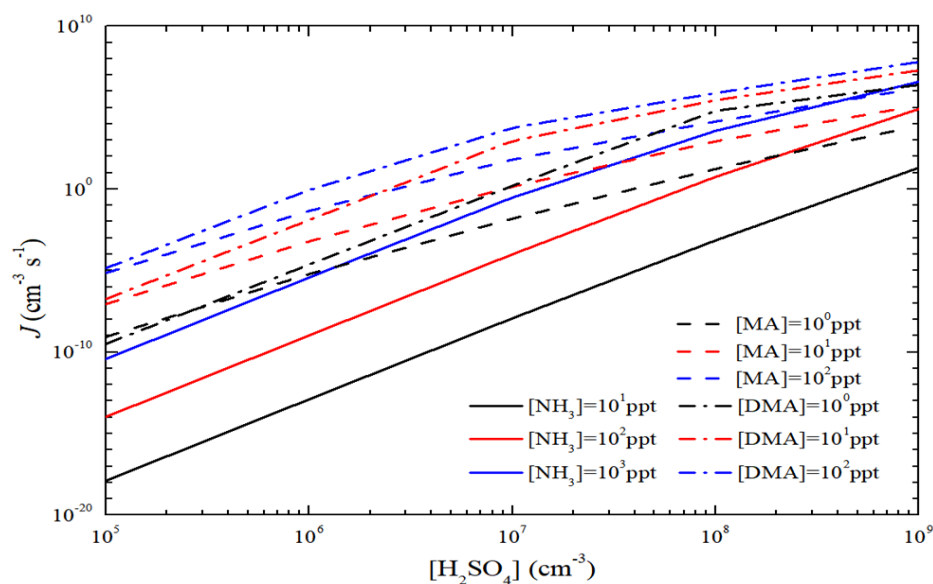

240

241 **Figure S6.** The cluster formation rate  $J$  ( $\text{cm}^{-3} \text{s}^{-1}$ ) out of the simulation  $(\text{SA})_m(\text{R}_1\text{NHR}_2)_n$  system

242 as a function of monomer concentration at 278.15 K.

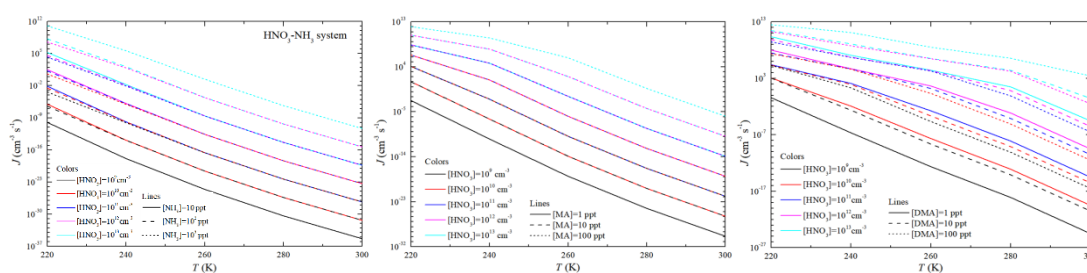

243

244 **Figure S7.** Simulated cluster formation rate  $J$  out of the simulation  $(\text{NA})_m(\text{R}_1\text{NHR}_2)_n$  system as a

245 function of temperature.

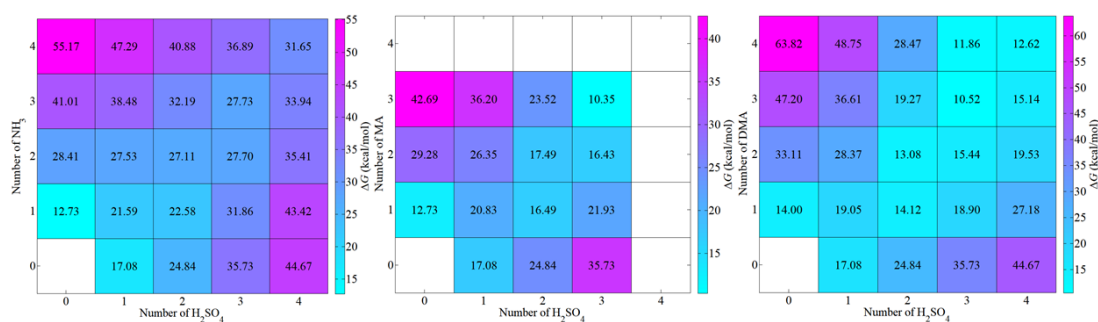

246

247 **Figure S8.** Actual Gibbs free energy surface for the formation of clusters  $(\text{SA})_m(\text{R}_1\text{NHR}_2)_n$  (right

248 for  $\text{NH}_3$ , middle for  $\text{MA}$ , left for  $\text{DMA}$ ) at 278.15 K,  $[\text{SA}] = 10^6 \text{ cm}^{-3}$ ,  $[\text{NH}_3] = 10^2 \text{ ppt}$  and  $[\text{MA}]$

249  $= [\text{DMA}] = 10 \text{ ppt}$ .

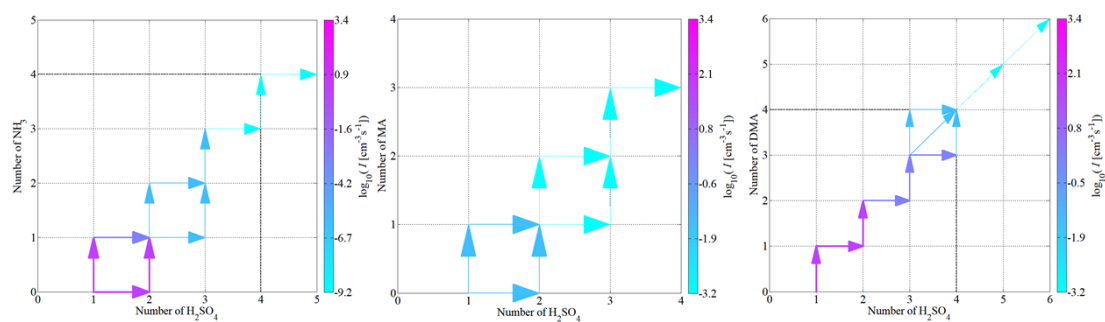

250

251 **Figure S9.** Main clustering pathways for the formation of clusters  $(SA)_m(R_1NHR_2)_n$  (right for  $NH_3$ ,  
 252 middle for MA, left for DMA) at 278.15 K,  $[SA] = 10^6 \text{ cm}^{-3}$ ,  $[NH_3] = 10^2 \text{ ppt}$  and  $[MA] = [DMA]$   
 253  $= 10 \text{ ppt}$ . For figure clarity, the pathways contributing less than 5% to the flux of the cluster are  
 254 not shown.

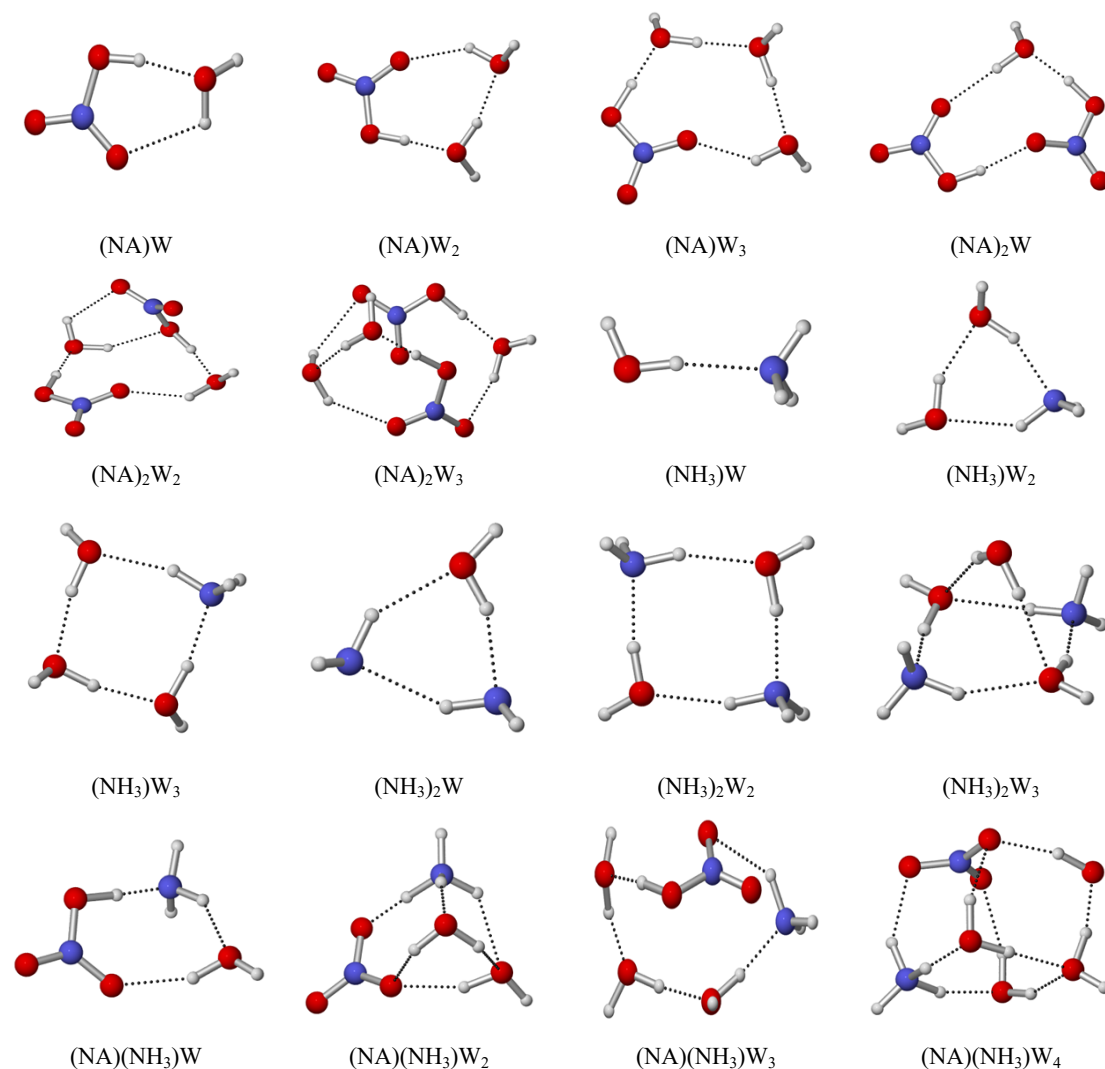



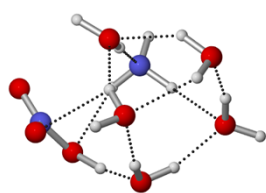

$(\text{NA})(\text{NH}_3)_5\text{W}_5$

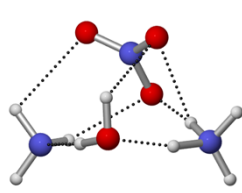

$(\text{NA})(\text{NH}_3)_2\text{W}$

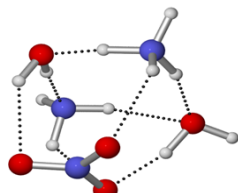

$(\text{NA})(\text{NH}_3)_2\text{W}_2$

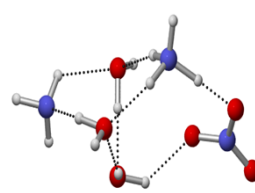

$(\text{NA})(\text{NH}_3)_2\text{W}_3$

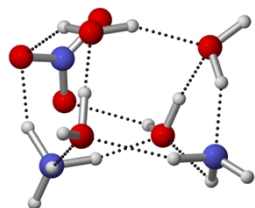

$(\text{NA})(\text{NH}_3)_2\text{W}_4$

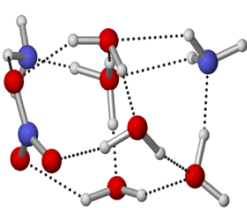

$(\text{NA})(\text{NH}_3)_2\text{W}_5$

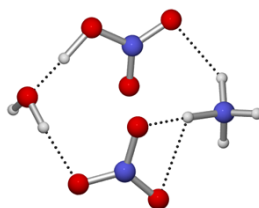

$(\text{NA})_2(\text{NH}_3)\text{W}$

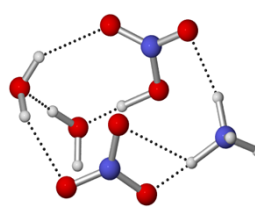

$(\text{NA})_2(\text{NH}_3)\text{W}_2$

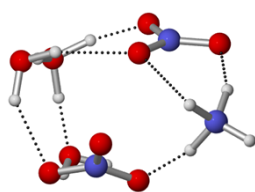

$(\text{NA})_2(\text{NH}_3)\text{W}_3$

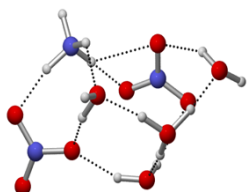

$(\text{NA})_2(\text{NH}_3)\text{W}_4$

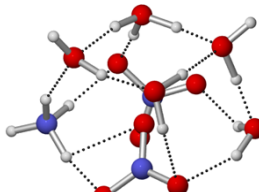

$(\text{NA})_2(\text{NH}_3)\text{W}_5$

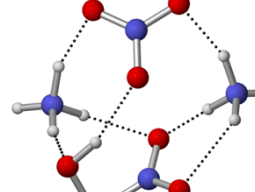

$(\text{NA})_2(\text{NH}_3)_2\text{W}$

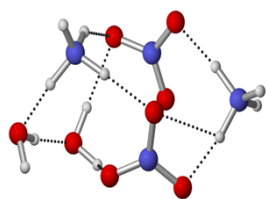

$(\text{NA})_2(\text{NH}_3)_2\text{W}_2$

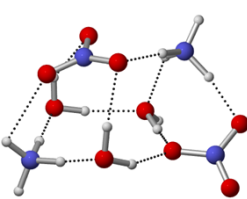

$(\text{NA})_2(\text{NH}_3)_2\text{W}_3$

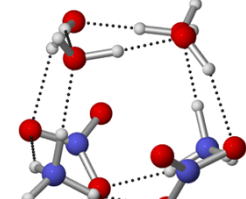

$(\text{NA})_2(\text{NH}_3)_2\text{W}_4$

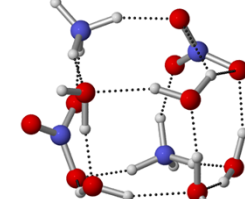

$(\text{NA})_2(\text{NH}_3)_2\text{W}_5$

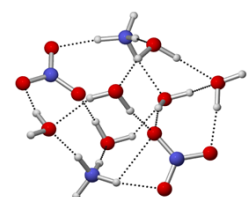

$(\text{NA})_2(\text{NH}_3)_2\text{W}_6$

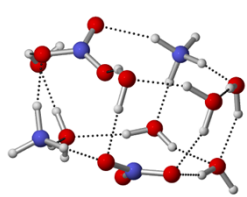

$(\text{NA})_2(\text{NH}_3)_2\text{W}_7$

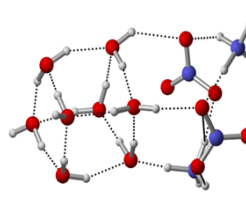

$(\text{NA})_2(\text{NH}_3)_2\text{W}_8$

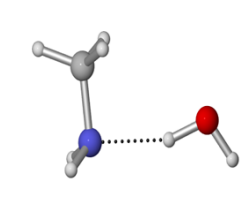

$(\text{MA})\text{W}$

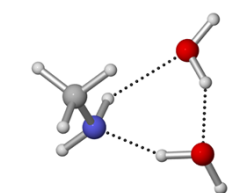

$(\text{MA})\text{W}_2$

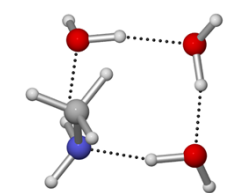

$(\text{MA})\text{W}_3$

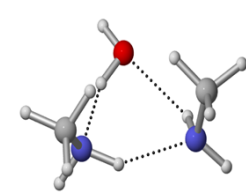

$(\text{MA})_2\text{W}$

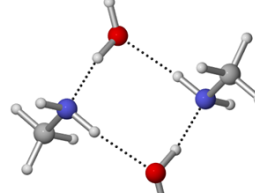

$(\text{MA})_2\text{W}_2$

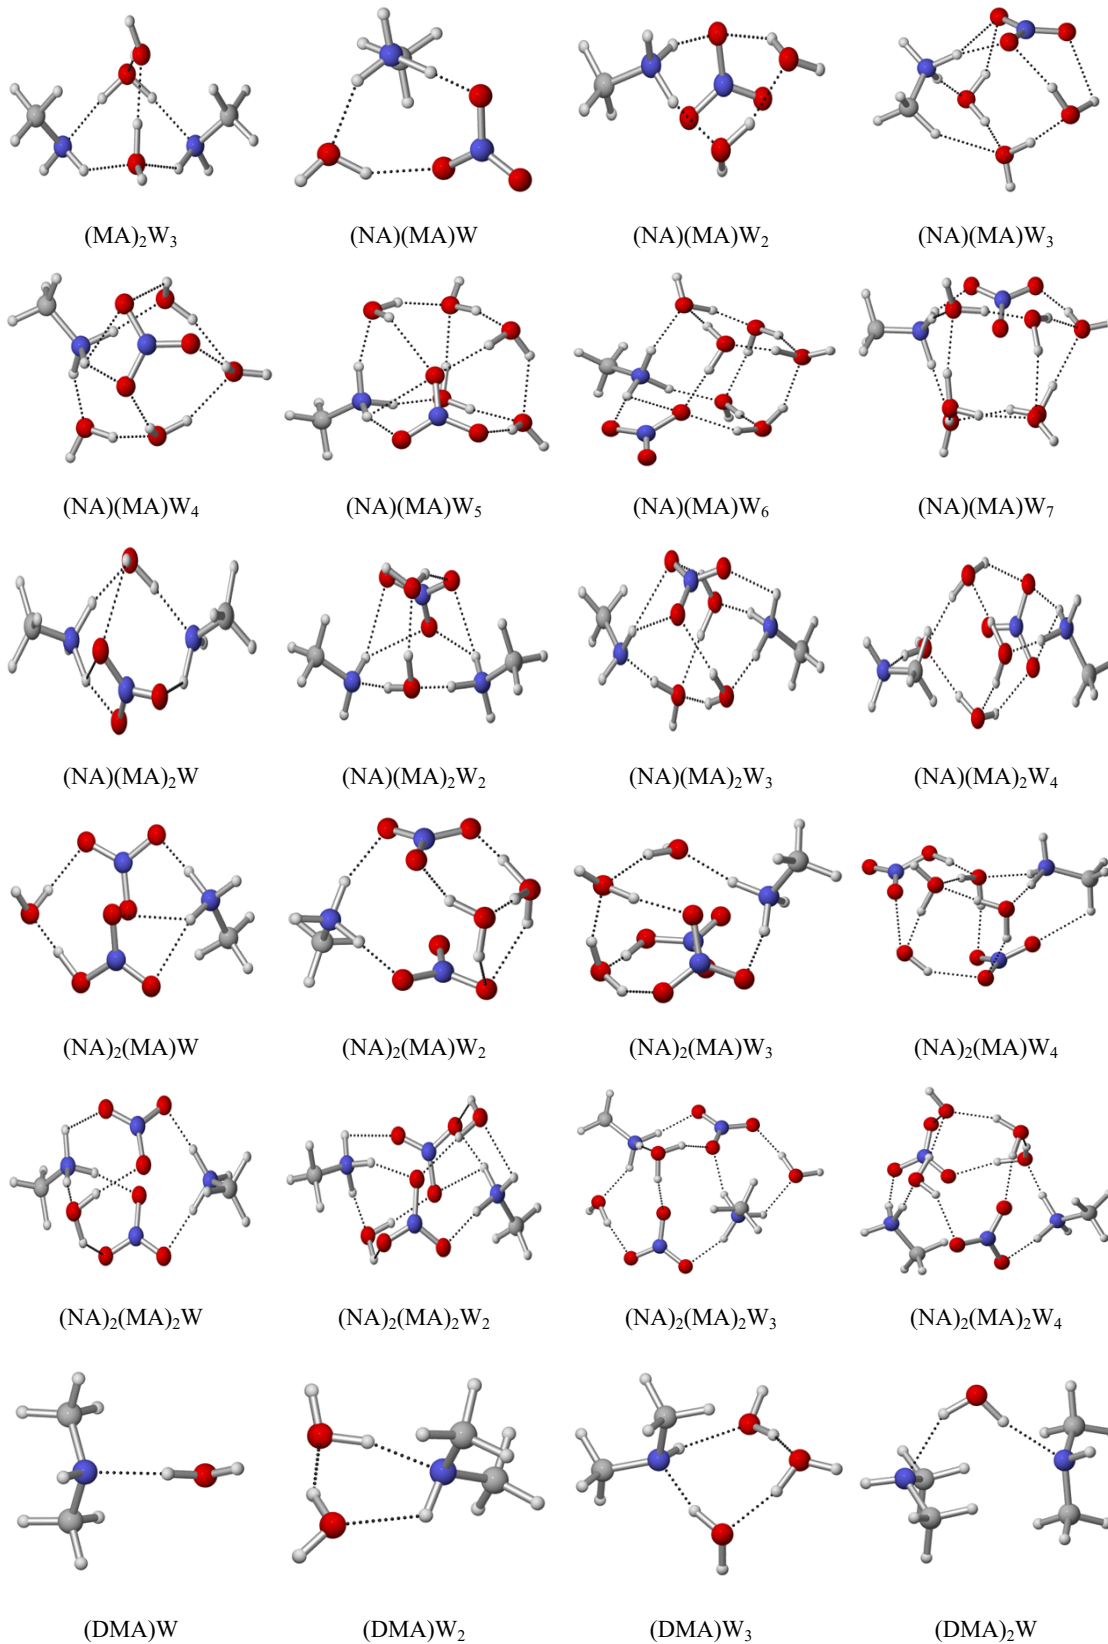



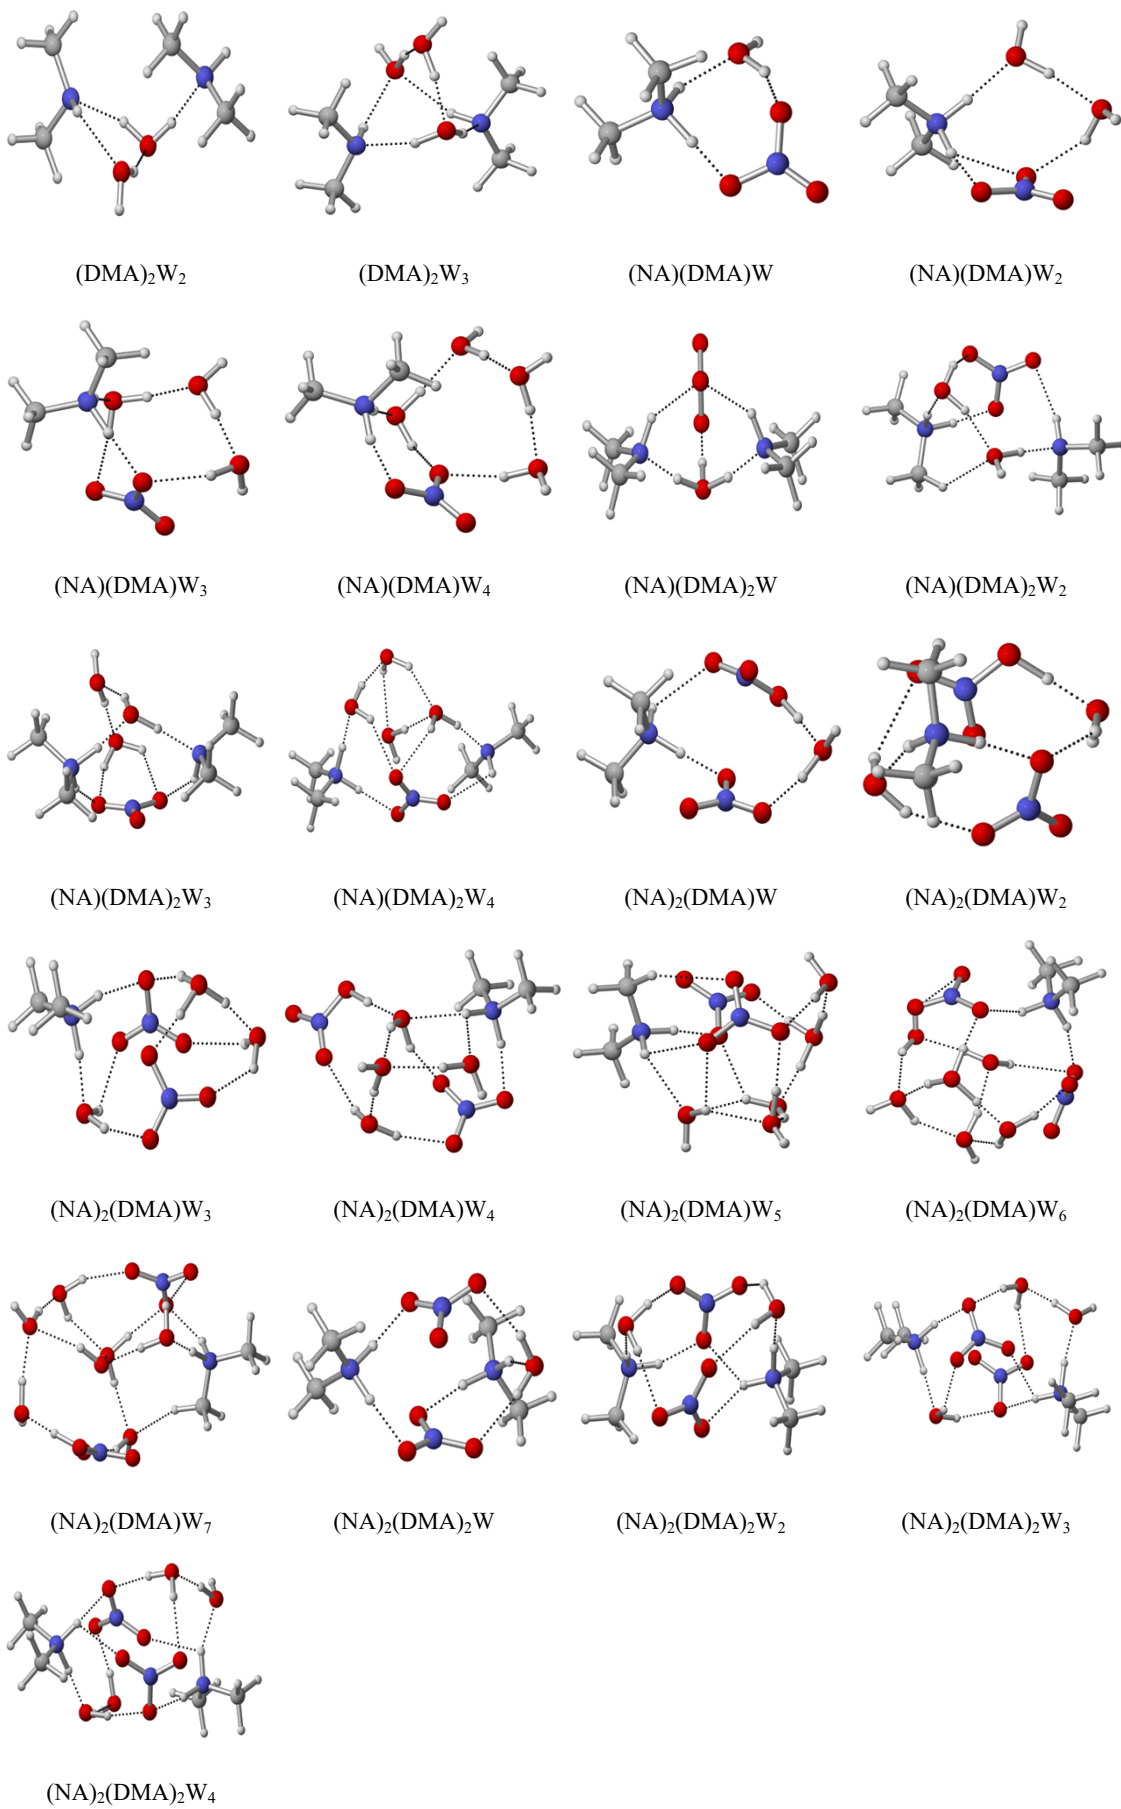

255 **Figure S10.** Optimized the lowest free energy cluster structures of  $(\text{NA})_m(\text{R}_1\text{NHR}_2)_n\text{W}_x$  ( $m = 1 \sim 2$ ,  
 256  $n = 0 \sim 2$  and  $x = 1 \sim 8$ ) at M06-2X/6-31++G(d,p) level. The red balls stand for O atoms, the blue  
 257 ones for N atoms, the green ones for C atoms, and the white ones for H atoms.

258

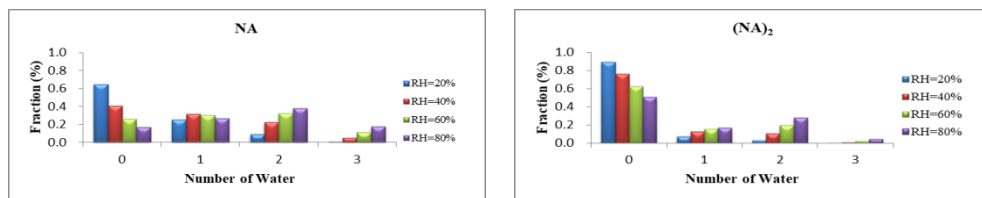

259

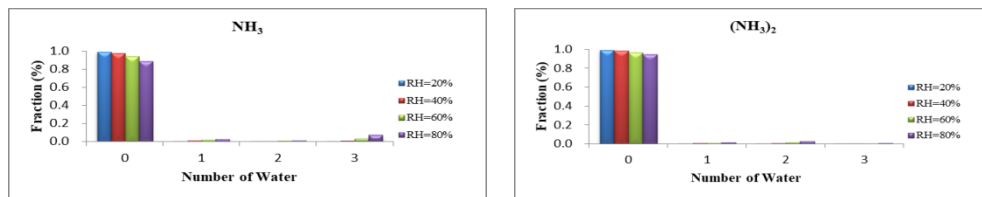

260

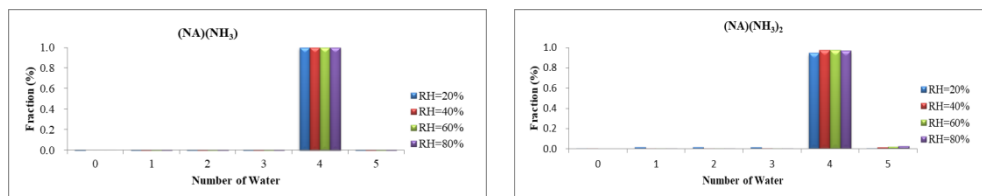

261

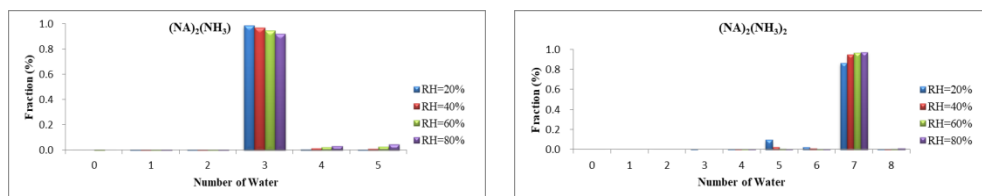

262

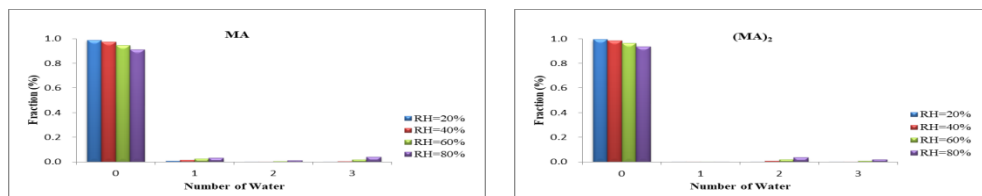

263

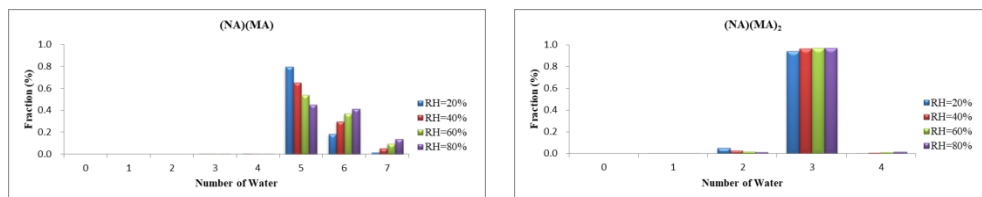

264

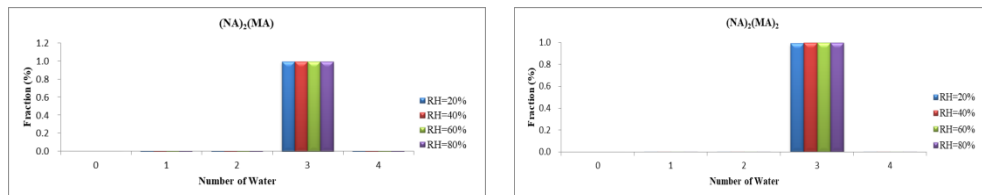

265

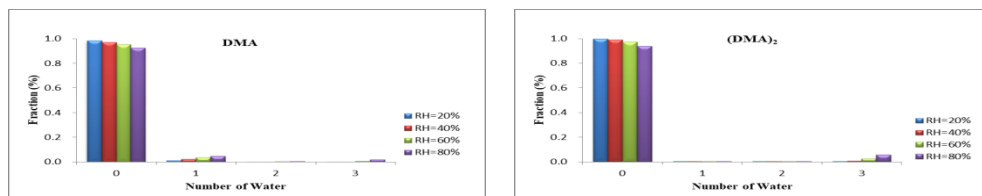

266

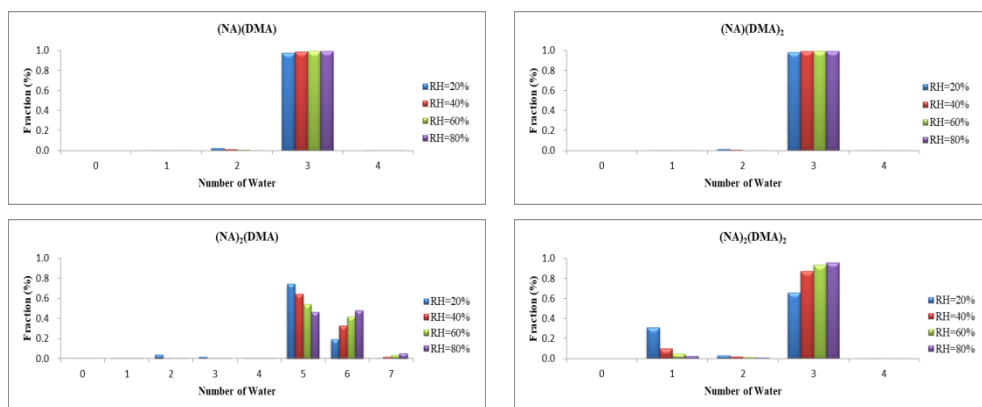

267

268 **Figure S11.** Hydrate distribution of clusters for NA, (NA)<sub>2</sub>, (NA)<sub>1</sub>(R<sub>1</sub>NHR<sub>2</sub>)<sub>1</sub>, (NA)<sub>1</sub>(R<sub>1</sub>NHR<sub>2</sub>)<sub>2</sub>,  
 269 (NA)<sub>2</sub>(R<sub>1</sub>NHR<sub>2</sub>)<sub>1</sub> and (NA)<sub>2</sub>(R<sub>1</sub>NHR<sub>2</sub>)<sub>2</sub> at different relative humidity and 278.15 K.

270 **Table S1.** Topological parameters at intermolecular bond critical points (*BCP*) of all dimers at the  
 271 M06-2X/6-31++G(d,p) level

| Species                         | $\rho/a.u.$ | $\nabla^2\rho/a.u.$ | $H/a.u.$ | $G/a.u.$ | $V/a.u.$ | $-G/V$ |
|---------------------------------|-------------|---------------------|----------|----------|----------|--------|
| (NA) <sub>2</sub>               | 0.0382      | 0.1102              | -0.0055  | 0.0330   | -0.0385  | 0.8571 |
| (NH <sub>3</sub> ) <sub>2</sub> | 0.0115      | 0.0453              | -0.0020  | 0.0094   | -0.0074  | 1.2703 |
| (MA) <sub>2</sub>               | 0.0151      | 0.0535              | 0.0020   | 0.0114   | -0.0095  | 1.2000 |
| (DMA) <sub>2</sub>              | 0.0125      | 0.0523              | 0.0021   | 0.0110   | -0.0090  | 1.2222 |
| (NA)(NH <sub>3</sub> )          | 0.0664      | 0.0466              | -0.0269  | 0.0385   | -0.0654  | 0.5887 |
| (NA)(MA)                        | 0.0809      | 0.0276              | -0.0378  | 0.0447   | -0.0824  | 0.5425 |
| (NA)(DMA)                       | 0.0936      | 0.0025              | -0.0486  | 0.0492   | -0.0979  | 0.5026 |

272

273 **Table S2.** The Average Partial charge  $\delta_A$  on R<sub>1</sub>NHR<sub>2</sub> groups in (NA)<sub>m</sub>(R<sub>1</sub>NHR<sub>2</sub>)<sub>n</sub> (1 ≤ m, n ≤ 4).

| $\delta_A$ | 1     | 2     | 3     | 4     |
|------------|-------|-------|-------|-------|
|            | 0.116 | 0.085 | 0.831 | 0.848 |
| 1          | 0.137 | 0.814 | 0.843 | 0.853 |
|            | 0.157 | 0.824 | 0.872 | 0.858 |
|            | 0.807 | 0.807 | 0.830 | 0.852 |
| 2          | 0.842 | 0.822 | 0.852 | 0.849 |
|            | 0.850 | 0.828 | 0.834 | 0.867 |
|            | 0.872 | 0.833 | 0.890 | 0.828 |
| 3          | 0.891 | 0.849 | 0.830 | 0.837 |
|            | 0.872 | 0.858 | 0.830 | 0.842 |
|            | 0.869 | 0.827 | 0.821 | 0.813 |
| 4          | 0.875 | 0.861 | 0.849 | 0.839 |
|            | 0.890 | 0.871 | 0.848 | 0.825 |

274 <sup>a</sup>Row and column indices indicate m NA molecules and n R<sub>1</sub>NHR<sub>2</sub> (above for NH<sub>3</sub>, middle for MA,  
 275 bottom for DMA) molecules, respectively.

277 **Table S3.** The thermochemical information including enthalpy  $\Delta H$  ( kcal/mol) and entropy  $\Delta S$  (  
 278 cal/(mol·K) ) for the studied molecular clusters at 298.15 K and 1 atm.

| Species                                           | $\Delta H$ (298.15 K) | $\Delta S$ (298.15 K) |
|---------------------------------------------------|-----------------------|-----------------------|
| (NA) <sub>2</sub>                                 | -9.79                 | -33.2                 |
| (NA) <sub>3</sub>                                 | -15.60                | -69.1                 |
| (NA) <sub>4</sub>                                 | -26.74                | -104.0                |
| (NH <sub>3</sub> ) <sub>2</sub>                   | -3.92                 | -24.7                 |
| (NH <sub>3</sub> ) <sub>3</sub>                   | -13.28                | -57.9                 |
| (NH <sub>3</sub> ) <sub>4</sub>                   | -20.59                | -89.3                 |
| (NA)(NH <sub>3</sub> )                            | -14.53                | -32.0                 |
| (NA)(NH <sub>3</sub> ) <sub>2</sub>               | -23.29                | -63.7                 |
| (NA)(NH <sub>3</sub> ) <sub>3</sub>               | -34.82                | -102.9                |
| (NA)(NH <sub>3</sub> ) <sub>4</sub>               | -43.46                | -131.4                |
| (NA) <sub>2</sub> (NH <sub>3</sub> )              | -24.22                | -71.5                 |
| (NA) <sub>2</sub> (NH <sub>3</sub> ) <sub>2</sub> | -43.25                | -107.4                |
| (NA) <sub>2</sub> (NH <sub>3</sub> ) <sub>3</sub> | -56.62                | -146.8                |
| (NA) <sub>2</sub> (NH <sub>3</sub> ) <sub>4</sub> | -72.57                | -173.4                |
| (NA) <sub>3</sub> (NH <sub>3</sub> )              | -36.91                | -105.6                |
| (NA) <sub>3</sub> (NH <sub>3</sub> ) <sub>2</sub> | -58.34                | -141.8                |
| (NA) <sub>3</sub> (NH <sub>3</sub> ) <sub>3</sub> | -77.28                | -186.3                |
| (NA) <sub>3</sub> (NH <sub>3</sub> ) <sub>4</sub> | -91.49                | -219.1                |
| (NA) <sub>4</sub> (NH <sub>3</sub> )              | -52.39                | -143.4                |
| (NA) <sub>4</sub> (NH <sub>3</sub> ) <sub>2</sub> | -73.18                | -181.4                |
| (NA) <sub>4</sub> (NH <sub>3</sub> ) <sub>3</sub> | -97.31                | -230.6                |
| (NA) <sub>4</sub> (NH <sub>3</sub> ) <sub>4</sub> | -126.39               | -267.6                |
| (MA) <sub>2</sub>                                 | -4.14                 | -28.6                 |
| (MA) <sub>3</sub>                                 | -12.63                | -61.6                 |
| (MA) <sub>4</sub>                                 | -19.99                | -94.7                 |
| (NA)(MA)                                          | -15.83                | -34.9                 |
| (NA)(MA) <sub>2</sub>                             | -25.46                | -72.8                 |
| (NA)(MA) <sub>3</sub>                             | -35.86                | -105.2                |
| (NA)(MA) <sub>4</sub>                             | -45.10                | -140.7                |
| (NA) <sub>2</sub> (MA)                            | -26.75                | -72.3                 |
| (NA) <sub>2</sub> (MA) <sub>2</sub>               | -52.35                | -109.4                |
| (NA) <sub>2</sub> (MA) <sub>3</sub>               | -68.87                | -150.4                |
| (NA) <sub>2</sub> (MA) <sub>4</sub>               | -82.29                | -185.8                |
| (NA) <sub>3</sub> (MA)                            | -41.63                | -113.9                |
| (NA) <sub>3</sub> (MA) <sub>2</sub>               | -68.67                | -156.4                |
| (NA) <sub>3</sub> (MA) <sub>3</sub>               | -92.78                | -190.0                |
| (NA) <sub>3</sub> (MA) <sub>4</sub>               | -107.76               | -224.2                |
| (NA) <sub>4</sub> (MA)                            | -50.68                | -151.9                |

|                                      |         |        |
|--------------------------------------|---------|--------|
| (NA) <sub>4</sub> (MA) <sub>2</sub>  | -83.18  | -192.6 |
| (NA) <sub>4</sub> (MA) <sub>3</sub>  | -107.21 | -234.7 |
| (NA) <sub>4</sub> (MA) <sub>4</sub>  | -140.61 | -272.4 |
| (DMA) <sub>2</sub>                   | -5.01   | -36.4  |
| (DMA) <sub>3</sub>                   | -13.87  | -68.6  |
| (DMA) <sub>4</sub>                   | -20.46  | -101.7 |
| (NA)(DMA)                            | -16.17  | -34.2  |
| (NA)(DMA) <sub>2</sub>               | -27.90  | -72.0  |
| (NA)(DMA) <sub>3</sub>               | -36.61  | -101.7 |
| (NA)(DMA) <sub>4</sub>               | -49.53  | -149.7 |
| (NA) <sub>2</sub> (DMA)              | -31.74  | -70.3  |
| (NA) <sub>2</sub> (DMA) <sub>2</sub> | -61.01  | -110.0 |
| (NA) <sub>2</sub> (DMA) <sub>3</sub> | -72.11  | -153.8 |
| (NA) <sub>2</sub> (DMA) <sub>4</sub> | -85.03  | -193.4 |
| (NA) <sub>3</sub> (DMA)              | -42.69  | -111.5 |
| (NA) <sub>3</sub> (DMA) <sub>2</sub> | -76.35  | -155.5 |
| (NA) <sub>3</sub> (DMA) <sub>3</sub> | -97.78  | -190.8 |
| (NA) <sub>3</sub> (DMA) <sub>4</sub> | -112.10 | -234.4 |
| (NA) <sub>4</sub> (DMA)              | -56.75  | -155.6 |
| (NA) <sub>4</sub> (DMA) <sub>2</sub> | -90.59  | -197.4 |
| (NA) <sub>4</sub> (DMA) <sub>3</sub> | -114.07 | -233.9 |
| (NA) <sub>4</sub> (DMA) <sub>4</sub> | -145.18 | -274.6 |

279

280 **Table S4.** Evaporation coefficients ( $s^{-1}$ ) for all evaporation pathways of  $(NA)_m(R_1NHR_2)_n$  ( $0 \leq m,$

281  $n \leq 4$ ) clusters under study at 278.15 K.

| Evaporation pathway                                | Evaporation coefficients |
|----------------------------------------------------|--------------------------|
| $(NH_3)_2 \rightarrow (NH_3) + (NH_3)$             | $1.32 \times 10^{12}$    |
| $(NH_3)_3 \rightarrow (NH_3)_2 + (NH_3)$           | $1.11 \times 10^{10}$    |
| $(NH_3)_4 \rightarrow (NH_3)_3 + (NH_3)$           | $2.01 \times 10^{11}$    |
| $(NH_3)_4 \rightarrow (NH_3)_2 + (NH_3)_2$         | $3.53 \times 10^8$       |
| $(NA)(NH_3) \rightarrow (NA)_1 + (NH_3)$           | $4.72 \times 10^5$       |
| $(NA)(NH_3)_2 \rightarrow (NA)(NH_3) + (NH_3)$     | $1.55 \times 10^{10}$    |
| $(NA)(NH_3)_2 \rightarrow (NA) + (NH_3)_2$         | $2.39 \times 10^3$       |
| $(NA)(NH_3)_3 \rightarrow (NA)(NH_3)_2 + (NH_3)$   | $5.09 \times 10^9$       |
| $(NA)(NH_3)_3 \rightarrow (NA)(NH_3) + (NH_3)_2$   | $2.25 \times 10^7$       |
| $(NA)(NH_3)_3 \rightarrow (NA) + (NH_3)_3$         | $9.82 \times 10^2$       |
| $(NA)(NH_3)_4 \rightarrow (NA)(NH_3)_3 + (NH_3)$   | $4.64 \times 10^9$       |
| $(NA)(NH_3)_4 \rightarrow (NA)(NH_3)_2 + (NH_3)_2$ | $6.02 \times 10^6$       |
| $(NA)(NH_3)_4 \rightarrow (NA)(NH_3) + (NH_3)_3$   | $7.57 \times 10^6$       |
| $(NA)(NH_3)_4 \rightarrow (NA) + (NH_3)_4$         | $2.08 \times 10^1$       |
| $(NA)_2 \rightarrow (NA) + (NA)$                   | $1.80 \times 10^9$       |
| $(NA)_2(NH_3) \rightarrow (NA)_2 + (NH_3)$         | $1.66 \times 10^7$       |
| $(NA)_2(NH_3) \rightarrow (NA)(NH_3) + (NA)$       | $1.12 \times 10^{11}$    |

|                                                                                                      |                        |
|------------------------------------------------------------------------------------------------------|------------------------|
| $(\text{NA})_2(\text{NH}_3)_2 \rightarrow (\text{NA})_2(\text{NH}_3) + (\text{NH}_3)$                | $1.28 \times 10^3$     |
| $(\text{NA})_2(\text{NH}_3)_2 \rightarrow (\text{NA})_2 + (\text{NH}_3)_2$                           | $5.51 \times 10^{-3}$  |
| $(\text{NA})_2(\text{NH}_3)_2 \rightarrow (\text{NA})(\text{NH}_3)_2 + (\text{NA})$                  | $8.47 \times 10^3$     |
| $(\text{NA})_2(\text{NH}_3)_2 \rightarrow (\text{NA})(\text{NH}_3) + (\text{NA})(\text{NH}_3)$       | $1.22 \times 10^8$     |
| $(\text{NA})_2(\text{NH}_3)_3 \rightarrow (\text{NA})_2(\text{NH}_3)_2 + (\text{NH}_3)$              | $2.33 \times 10^8$     |
| $(\text{NA})_2(\text{NH}_3)_3 \rightarrow (\text{NA})_2(\text{NH}_3) + (\text{NH}_3)_2$              | $7.06 \times 10^{-2}$  |
| $(\text{NA})_2(\text{NH}_3)_3 \rightarrow (\text{NA})_2 + (\text{NH}_3)_3$                           | $8.66 \times 10^{-5}$  |
| $(\text{NA})_2(\text{NH}_3)_3 \rightarrow (\text{NA})(\text{NH}_3)_3 + (\text{NA})$                  | $3.59 \times 10^2$     |
| $(\text{NA})_2(\text{NH}_3)_3 \rightarrow (\text{NA})(\text{NH}_3)_2 + (\text{NA})(\text{NH}_3)$     | $3.05 \times 10^6$     |
| $(\text{NA})_2(\text{NH}_3)_4 \rightarrow (\text{NA})_2(\text{NH}_3)_3 + (\text{NH}_3)$              | $3.67 \times 10^3$     |
| $(\text{NA})_2(\text{NH}_3)_4 \rightarrow (\text{NA})_2(\text{NH}_3)_2 + (\text{NH}_3)_2$            | $1.87 \times 10^{-1}$  |
| $(\text{NA})_2(\text{NH}_3)_4 \rightarrow (\text{NA})_2(\text{NH}_3) + (\text{NH}_3)_3$              | $1.63 \times 10^{-8}$  |
| $(\text{NA})_2(\text{NH}_3)_4 \rightarrow (\text{NA})_2 + (\text{NH}_3)_4$                           | $1.25 \times 10^{-12}$ |
| $(\text{NA})_2(\text{NH}_3)_4 \rightarrow (\text{NA})(\text{NH}_3)_4 + (\text{NA})$                  | $2.67 \times 10^{-4}$  |
| $(\text{NA})_2(\text{NH}_3)_4 \rightarrow (\text{NA})(\text{NH}_3)_3 + (\text{NA})(\text{NH}_3)$     | 1.89                   |
| $(\text{NA})_2(\text{NH}_3)_4 \rightarrow (\text{NA})(\text{NH}_3)_2 + (\text{NA})(\text{NH}_3)_2$   | $2.79 \times 10^{-1}$  |
| $(\text{NA})_3 \rightarrow (\text{NA})_2 + (\text{NA})$                                              | $2.01 \times 10^{13}$  |
| $(\text{NA})_3(\text{NH}_3) \rightarrow (\text{NA})_3 + (\text{NH}_3)$                               | $2.93 \times 10^1$     |
| $(\text{NA})_3(\text{NH}_3) \rightarrow (\text{NA})_2(\text{NH}_3) + (\text{NA})$                    | $3.30 \times 10^7$     |
| $(\text{NA})_3(\text{NH}_3) \rightarrow (\text{NA})_2 + (\text{NA})(\text{NH}_3)$                    | $9.26 \times 10^8$     |
| $(\text{NA})_3(\text{NH}_3)_2 \rightarrow (\text{NA})_3(\text{NH}_3) + (\text{NH}_3)$                | $2.30 \times 10^1$     |
| $(\text{NA})_3(\text{NH}_3)_2 \rightarrow (\text{NA})_3 + (\text{NH}_3)_2$                           | $1.50 \times 10^{10}$  |
| $(\text{NA})_3(\text{NH}_3)_2 \rightarrow (\text{NA})_2(\text{NH}_3)_2 + (\text{NA})$                | $5.57 \times 10^5$     |
| $(\text{NA})_3(\text{NH}_3)_2 \rightarrow (\text{NA})_2(\text{NH}_3) + (\text{NA})(\text{NH}_3)$     | $1.11 \times 10^3$     |
| $(\text{NA})_3(\text{NH}_3)_2 \rightarrow (\text{NA})_2 + (\text{NA})(\text{NH}_3)_2$                | 1.08                   |
| $(\text{NA})_3(\text{NH}_3)_3 \rightarrow (\text{NA})_3(\text{NH}_3)_2 + (\text{NH}_3)$              | $1.37 \times 10^5$     |
| $(\text{NA})_3(\text{NH}_3)_3 \rightarrow (\text{NA})_3(\text{NH}_3) + (\text{NH}_3)_2$              | $6.56 \times 10^{-7}$  |
| $(\text{NA})_3(\text{NH}_3)_3 \rightarrow (\text{NA})_3 + (\text{NH}_3)_3$                           | $1.22 \times 10^{-15}$ |
| $(\text{NA})_3(\text{NH}_3)_3 \rightarrow (\text{NA})_2(\text{NH}_3)_3 + (\text{NA})$                | $3.11 \times 10^2$     |
| $(\text{NA})_3(\text{NH}_3)_3 \rightarrow (\text{NA})_2(\text{NH}_3)_2 + (\text{NA})(\text{NH}_3)$   | $1.04 \times 10^5$     |
| $(\text{NA})_3(\text{NH}_3)_3 \rightarrow (\text{NA})_2(\text{NH}_3) + (\text{NA})(\text{NH}_3)_2$   | $7.17 \times 10^{-3}$  |
| $(\text{NA})_3(\text{NH}_3)_3 \rightarrow (\text{NA})_2 + (\text{NA})(\text{NH}_3)_3$                | $2.37 \times 10^{-5}$  |
| $(\text{NA})_3(\text{NH}_3)_4 \rightarrow (\text{NA})_3(\text{NH}_3)_3 + (\text{NH}_3)$              | $2.22 \times 10^6$     |
| $(\text{NA})_3(\text{NH}_3)_4 \rightarrow (\text{NA})_3(\text{NH}_3)_2 + (\text{NH}_3)_2$            | $5.93 \times 10^{-2}$  |
| $(\text{NA})_3(\text{NH}_3)_4 \rightarrow (\text{NA})_3(\text{NH}_3) + (\text{NH}_3)_3$              | $8.13 \times 10^{-11}$ |
| $(\text{NA})_3(\text{NH}_3)_4 \rightarrow (\text{NA})_3 + (\text{NH}_3)_4$                           | $9.54 \times 10^{-21}$ |
| $(\text{NA})_3(\text{NH}_3)_4 \rightarrow (\text{NA})_2(\text{NH}_3)_4 + (\text{NA})$                | $1.78 \times 10^5$     |
| $(\text{NA})_3(\text{NH}_3)_4 \rightarrow (\text{NA})_2(\text{NH}_3)_3 + (\text{NA})(\text{NH}_3)$   | $8.80 \times 10^2$     |
| $(\text{NA})_3(\text{NH}_3)_4 \rightarrow (\text{NA})_2(\text{NH}_3)_2 + (\text{NA})(\text{NH}_3)_2$ | $1.02 \times 10^1$     |
| $(\text{NA})_3(\text{NH}_3)_4 \rightarrow (\text{NA})_2(\text{NH}_3) + (\text{NA})(\text{NH}_3)_3$   | $2.40 \times 10^{-6}$  |
| $(\text{NA})_3(\text{NH}_3)_4 \rightarrow (\text{NA})_2 + (\text{NA})(\text{NH}_3)_4$                | $9.50 \times 10^{-9}$  |
| $(\text{NA})_4 \rightarrow (\text{NA})_3 + (\text{NA})$                                              | $8.64 \times 10^8$     |
| $(\text{NA})_4 \rightarrow (\text{NA})_2 + (\text{NA})_2$                                            | $2.02 \times 10^{12}$  |
| $(\text{NA})_4(\text{NH}_3) \rightarrow (\text{NA})_4 + (\text{NH}_3)$                               | $5.79 \times 10^{-2}$  |

|                                                                                                        |                        |
|--------------------------------------------------------------------------------------------------------|------------------------|
| $(\text{NA})_4(\text{NH}_3) \rightarrow (\text{NA})_3(\text{NH}_3) + (\text{NA})$                      | $1.61 \times 10^6$     |
| $(\text{NA})_4(\text{NH}_3) \rightarrow (\text{NA})_3 + (\text{NA})(\text{NH}_3)$                      | $6.86 \times 10^1$     |
| $(\text{NA})_4(\text{NH}_3) \rightarrow (\text{NA})_2(\text{NH}_3) + (\text{NA})_2$                    | $1.14 \times 10^4$     |
| $(\text{NA})_4(\text{NH}_3)_2 \rightarrow (\text{NA})_4(\text{NH}_3) + (\text{NH}_3)$                  | $2.00 \times 10^2$     |
| $(\text{NA})_4(\text{NH}_3)_2 \rightarrow (\text{NA})_4 + (\text{NH}_3)_2$                             | $2.28 \times 10^{-12}$ |
| $(\text{NA})_4(\text{NH}_3)_2 \rightarrow (\text{NA})_3(\text{NH}_3)_2 + (\text{NA})$                  | $1.33 \times 10^7$     |
| $(\text{NA})_4(\text{NH}_3)_2 \rightarrow (\text{NA})_3(\text{NH}_3) + (\text{NA})(\text{NH}_3)$       | $4.16 \times 10^2$     |
| $(\text{NA})_4(\text{NH}_3)_2 \rightarrow (\text{NA})_3 + (\text{NA})(\text{NH}_3)_2$                  | $6.18 \times 10^{-7}$  |
| $(\text{NA})_4(\text{NH}_3)_2 \rightarrow (\text{NA})_2(\text{NH}_3)_2 + (\text{NA})_2$                | $1.49 \times 10^3$     |
| $(\text{NA})_4(\text{NH}_3)_2 \rightarrow (\text{NA})_2(\text{NH}_3) + (\text{NA})_2(\text{NH}_3)$     | $5.28 \times 10^{-2}$  |
| $(\text{NA})_4(\text{NH}_3)_3 \rightarrow (\text{NA})_4(\text{NH}_3)_2 + (\text{NH}_3)$                | $1.35 \times 10^2$     |
| $(\text{NA})_4(\text{NH}_3)_3 \rightarrow (\text{NA})_4(\text{NH}_3) + (\text{NH}_3)_2$                | $5.02 \times 10^{-9}$  |
| $(\text{NA})_4(\text{NH}_3)_3 \rightarrow (\text{NA})_4 + (\text{NH}_3)_3$                             | $1.65 \times 10^{-20}$ |
| $(\text{NA})_4(\text{NH}_3)_3 \rightarrow (\text{NA})_3(\text{NH}_3)_3 + (\text{NA})$                  | $1.25 \times 10^4$     |
| $(\text{NA})_4(\text{NH}_3)_3 \rightarrow (\text{NA})_3(\text{NH}_3)_2 + (\text{NA})(\text{NH}_3)$     | $2.19 \times 10^3$     |
| $(\text{NA})_4(\text{NH}_3)_3 \rightarrow (\text{NA})_3(\text{NH}_3) + (\text{NA})(\text{NH}_3)_2$     | $2.39 \times 10^{-6}$  |
| $(\text{NA})_4(\text{NH}_3)_3 \rightarrow (\text{NA})_3 + (\text{NA})(\text{NH}_3)_3$                  | $1.20 \times 10^{-14}$ |
| $(\text{NA})_4(\text{NH}_3)_3 \rightarrow (\text{NA})_2(\text{NH}_3)_3 + (\text{NA})_2$                | $7.36 \times 10^{-4}$  |
| $(\text{NA})_4(\text{NH}_3)_3 \rightarrow (\text{NA})_2(\text{NH}_3)_2 + (\text{NA})_2(\text{NH}_3)$   | $8.77 \times 10^{-3}$  |
| $(\text{NA})_4(\text{NH}_3)_4 \rightarrow (\text{NA})_4(\text{NH}_3)_3 + (\text{NH}_3)$                | $4.01 \times 10^{-5}$  |
| $(\text{NA})_4(\text{NH}_3)_4 \rightarrow (\text{NA})_4(\text{NH}_3)_2 + (\text{NH}_3)_2$              | $9.59 \times 10^{-16}$ |
| $(\text{NA})_4(\text{NH}_3)_4 \rightarrow (\text{NA})_4(\text{NH}_3) + (\text{NH}_3)_3$                | $1.03 \times 10^{-23}$ |
| $(\text{NA})_4(\text{NH}_3)_4 \rightarrow (\text{NA})_4 + (\text{NH}_3)_4$                             | $2.12 \times 10^{-36}$ |
| $(\text{NA})_4(\text{NH}_3)_4 \rightarrow (\text{NA})_3(\text{NH}_3)_4 + (\text{NA})$                  | $2.17 \times 10^{-7}$  |
| $(\text{NA})_4(\text{NH}_3)_4 \rightarrow (\text{NA})_3(\text{NH}_3)_3 + (\text{NA})(\text{NH}_3)$     | $5.83 \times 10^{-7}$  |
| $(\text{NA})_4(\text{NH}_3)_4 \rightarrow (\text{NA})_3(\text{NH}_3)_2 + (\text{NA})(\text{NH}_3)_2$   | $3.57 \times 10^{-12}$ |
| $(\text{NA})_4(\text{NH}_3)_4 \rightarrow (\text{NA})_3(\text{NH}_3) + (\text{NA})(\text{NH}_3)_3$     | $1.32 \times 10^{-20}$ |
| $(\text{NA})_4(\text{NH}_3)_4 \rightarrow (\text{NA})_3 + (\text{NA})(\text{NH}_3)_4$                  | $7.97 \times 10^{-29}$ |
| $(\text{NA})_4(\text{NH}_3)_4 \rightarrow (\text{NA})_2(\text{NH}_3)_4 + (\text{NA})_2$                | $6.98 \times 10^{-12}$ |
| $(\text{NA})_4(\text{NH}_3)_4 \rightarrow (\text{NA})_2(\text{NH}_3)_3 + (\text{NA})_2(\text{NH}_3)$   | $1.23 \times 10^{-15}$ |
| $(\text{NA})_4(\text{NH}_3)_4 \rightarrow (\text{NA})_2(\text{NH}_3)_2 + (\text{NA})_2(\text{NH}_3)_2$ | $1.04 \times 10^{-10}$ |
| $(\text{MA})_2 \rightarrow (\text{MA}) + (\text{MA})$                                                  | $4.53 \times 10^{12}$  |
| $(\text{MA})_3 \rightarrow (\text{MA})_2 + (\text{MA})$                                                | $4.96 \times 10^{10}$  |
| $(\text{MA})_4 \rightarrow (\text{MA})_3 + (\text{MA})$                                                | $3.81 \times 10^{11}$  |
| $(\text{MA})_4 \rightarrow (\text{MA})_2 + (\text{MA})_2$                                              | $8.69 \times 10^8$     |
| $(\text{NA})(\text{MA}) \rightarrow (\text{NA}) + (\text{MA})$                                         | $3.91 \times 10^5$     |
| $(\text{NA})(\text{MA})_2 \rightarrow (\text{NA})(\text{MA}) + (\text{MA})$                            | $6.71 \times 10^{10}$  |
| $(\text{NA})(\text{MA})_2 \rightarrow (\text{NA}) + (\text{MA})_2$                                     | $2.95 \times 10^3$     |
| $(\text{NA})(\text{MA})_3 \rightarrow (\text{NA})(\text{MA})_2 + (\text{MA})$                          | $1.61 \times 10^9$     |
| $(\text{NA})(\text{MA})_3 \rightarrow (\text{NA})(\text{MA}) + (\text{MA})_2$                          | $1.01 \times 10^7$     |
| $(\text{NA})(\text{MA})_3 \rightarrow (\text{NA}) + (\text{MA})_3$                                     | $9.71 \times 10^1$     |
| $(\text{NA})(\text{MA})_4 \rightarrow (\text{NA})(\text{MA})_3 + (\text{MA})$                          | $5.21 \times 10^{10}$  |
| $(\text{NA})(\text{MA})_4 \rightarrow (\text{NA})(\text{MA})_2 + (\text{MA})_2$                        | $6.85 \times 10^6$     |
| $(\text{NA})(\text{MA})_4 \rightarrow (\text{NA})(\text{MA}) + (\text{MA})_3$                          | $9.37 \times 10^6$     |

|                                                                                              |                        |
|----------------------------------------------------------------------------------------------|------------------------|
| $(\text{NA})(\text{MA})_4 \rightarrow (\text{NA})+(\text{MA})_4$                             | $1.34 \times 10^1$     |
| $(\text{NA})_2(\text{MA}) \rightarrow (\text{NA})_2+(\text{MA})$                             | $4.70 \times 10^5$     |
| $(\text{NA})_2(\text{MA}) \rightarrow (\text{NA})(\text{MA})+(\text{NA})$                    | $4.56 \times 10^9$     |
| $(\text{NA})_2(\text{MA})_2 \rightarrow (\text{NA})_2(\text{MA})+(\text{MA})$                | $1.01 \times 10^{-1}$  |
| $(\text{NA})_2(\text{MA})_2 \rightarrow (\text{NA})_2+(\text{MA})_2$                         | $4.49 \times 10^{-9}$  |
| $(\text{NA})_2(\text{MA})_2 \rightarrow (\text{NA})(\text{MA})_2+(\text{NA})$                | $6.97 \times 10^{-3}$  |
| $(\text{NA})_2(\text{MA})_2 \rightarrow (\text{NA})(\text{MA})+(\text{NA})(\text{MA})$       | $4.95 \times 10^2$     |
| $(\text{NA})_2(\text{MA})_3 \rightarrow (\text{NA})_2(\text{MA})_2+(\text{MA})$              | $3.25 \times 10^6$     |
| $(\text{NA})_2(\text{MA})_3 \rightarrow (\text{NA})_2(\text{MA})+(\text{MA})_2$              | $2.70 \times 10^{-8}$  |
| $(\text{NA})_2(\text{MA})_3 \rightarrow (\text{NA})_2+(\text{MA})_3$                         | $2.63 \times 10^{-13}$ |
| $(\text{NA})_2(\text{MA})_3 \rightarrow (\text{NA})(\text{MA})_3+(\text{NA})$                | $1.42 \times 10^{-5}$  |
| $(\text{NA})_2(\text{MA})_3 \rightarrow (\text{NA})(\text{MA})_2+(\text{NA})(\text{MA})$     | $4.24 \times 10^{-2}$  |
| $(\text{NA})_2(\text{MA})_4 \rightarrow (\text{NA})_2(\text{MA})_3+(\text{MA})$              | $4.63 \times 10^7$     |
| $(\text{NA})_2(\text{MA})_4 \rightarrow (\text{NA})_2(\text{MA})_2+(\text{MA})_2$            | $1.11 \times 10^1$     |
| $(\text{NA})_2(\text{MA})_4 \rightarrow (\text{NA})_2(\text{MA})+(\text{MA})_3$              | $2.03 \times 10^{-11}$ |
| $(\text{NA})_2(\text{MA})_4 \rightarrow (\text{NA})_2+(\text{MA})_4$                         | $2.93 \times 10^{-17}$ |
| $(\text{NA})_2(\text{MA})_4 \rightarrow (\text{NA})(\text{MA})_4+(\text{NA})$                | $1.27 \times 10^{-8}$  |
| $(\text{NA})_2(\text{MA})_4 \rightarrow (\text{NA})(\text{MA})_3+(\text{NA})(\text{MA})$     | $1.10 \times 10^{-3}$  |
| $(\text{NA})_2(\text{MA})_4 \rightarrow (\text{NA})(\text{MA})_2+(\text{NA})(\text{MA})_2$   | $1.16 \times 10^{-5}$  |
| $(\text{NA})_3(\text{MA}) \rightarrow (\text{NA})_3+(\text{MA})$                             | 1.79                   |
| $(\text{NA})_3(\text{MA}) \rightarrow (\text{NA})_2(\text{MA})+(\text{NA})$                  | $4.54 \times 10^7$     |
| $(\text{NA})_3(\text{MA}) \rightarrow (\text{NA})_2+(\text{NA})(\text{MA})$                  | $4.59 \times 10^7$     |
| $(\text{NA})_3(\text{MA})_2 \rightarrow (\text{NA})_3(\text{MA})+(\text{MA})$                | $1.23 \times 10^{-1}$  |
| $(\text{NA})_3(\text{MA})_2 \rightarrow (\text{NA})_3+(\text{MA})_2$                         | $1.84 \times 10^{-14}$ |
| $(\text{NA})_3(\text{MA})_2 \rightarrow (\text{NA})_2(\text{MA})_2+(\text{NA})$              | $5.61 \times 10^7$     |
| $(\text{NA})_3(\text{MA})_2 \rightarrow (\text{NA})_2(\text{MA})+(\text{NA})(\text{MA})$     | $1.06 \times 10^1$     |
| $(\text{NA})_3(\text{MA})_2 \rightarrow (\text{NA})_2+(\text{NA})(\text{MA})_2$              | $7.54 \times 10^{-5}$  |
| $(\text{NA})_3(\text{MA})_3 \rightarrow (\text{NA})_3(\text{MA})_2+(\text{MA})$              | $2.86 \times 10^{-1}$  |
| $(\text{NA})_3(\text{MA})_3 \rightarrow (\text{NA})_3(\text{MA})+(\text{MA})_2$              | $2.63 \times 10^{-15}$ |
| $(\text{NA})_3(\text{MA})_3 \rightarrow (\text{NA})_3+(\text{MA})_3$                         | $8.62 \times 10^{-26}$ |
| $(\text{NA})_3(\text{MA})_3 \rightarrow (\text{NA})_2(\text{MA})_3+(\text{NA})$              | 4.98                   |
| $(\text{NA})_3(\text{MA})_3 \rightarrow (\text{NA})_2(\text{MA})_2+(\text{NA})(\text{MA})$   | $2.72 \times 10^1$     |
| $(\text{NA})_3(\text{MA})_3 \rightarrow (\text{NA})_2(\text{MA})+(\text{NA})(\text{MA})_2$   | $3.62 \times 10^{-11}$ |
| $(\text{NA})_3(\text{MA})_3 \rightarrow (\text{NA})_2+(\text{NA})(\text{MA})_3$              | $1.22 \times 10^{-14}$ |
| $(\text{NA})_3(\text{MA})_4 \rightarrow (\text{NA})_3(\text{MA})_3+(\text{MA})$              | $1.99 \times 10^6$     |
| $(\text{NA})_3(\text{MA})_4 \rightarrow (\text{NA})_3(\text{MA})_2+(\text{MA})_2$            | $3.87 \times 10^{-8}$  |
| $(\text{NA})_3(\text{MA})_4 \rightarrow (\text{NA})_3(\text{MA})+(\text{MA})_3$              | $7.83 \times 10^{-20}$ |
| $(\text{NA})_3(\text{MA})_4 \rightarrow (\text{NA})_3+(\text{MA})_4$                         | $3.81 \times 10^{-31}$ |
| $(\text{NA})_3(\text{MA})_4 \rightarrow (\text{NA})_2(\text{MA})_4+(\text{NA})$              | $2.15 \times 10^{-1}$  |
| $(\text{NA})_3(\text{MA})_4 \rightarrow (\text{NA})_2(\text{MA})_3+(\text{NA})(\text{MA})$   | $1.53 \times 10^1$     |
| $(\text{NA})_3(\text{MA})_4 \rightarrow (\text{NA})_2(\text{MA})_2+(\text{NA})(\text{MA})_2$ | $5.91 \times 10^{-4}$  |
| $(\text{NA})_3(\text{MA})_4 \rightarrow (\text{NA})_2(\text{MA})+(\text{NA})(\text{MA})_3$   | $3.74 \times 10^{-14}$ |
| $(\text{NA})_3(\text{MA})_4 \rightarrow (\text{NA})_2+(\text{NA})(\text{MA})_4$              | $4.34 \times 10^{-19}$ |
| $(\text{NA})_4(\text{MA}) \rightarrow (\text{NA})_4+(\text{MA})$                             | $2.87 \times 10^2$     |



|                                                        |                        |
|--------------------------------------------------------|------------------------|
| $(NA)_4(MA) \rightarrow (NA)_3(MA) + (NA)$             | $1.61 \times 10^{11}$  |
| $(NA)_4(MA) \rightarrow (NA)_3 + (NA)(MA)$             | $5.46 \times 10^5$     |
| $(NA)_4(MA) \rightarrow (NA)_2(MA) + (NA)_2$           | $1.42 \times 10^9$     |
| $(NA)_4(MA)_2 \rightarrow (NA)_4(MA) + (MA)$           | $5.64 \times 10^{-6}$  |
| $(NA)_4(MA)_2 \rightarrow (NA)_4 + (MA)_2$             | $1.22 \times 10^{-16}$ |
| $(NA)_4(MA)_2 \rightarrow (NA)_3(MA)_2 + (NA)$         | $7.42 \times 10^6$     |
| $(NA)_4(MA)_2 \rightarrow (NA)_3(MA) + (NA)(MA)$       | 1.55                   |
| $(NA)_4(MA)_2 \rightarrow (NA)_3 + (NA)(MA)_2$         | $3.72 \times 10^{-11}$ |
| $(NA)_4(MA)_2 \rightarrow (NA)_2(MA)_2 + (NA)_2$       | $7.28 \times 10^4$     |
| $(NA)_4(MA)_2 \rightarrow (NA)_2(MA) + (NA)_2(MA)$     | $6.81 \times 10^{-3}$  |
| $(NA)_4(MA)_3 \rightarrow (NA)_4(MA)_2 + (MA)$         | $1.96 \times 10^1$     |
| $(NA)_4(MA)_3 \rightarrow (NA)_4(MA) + (MA)_2$         | $7.60 \times 10^{-18}$ |
| $(NA)_4(MA)_3 \rightarrow (NA)_4 + (MA)_3$             | $3.61 \times 10^{-26}$ |
| $(NA)_4(MA)_3 \rightarrow (NA)_3(MA)_3 + (NA)$         | $5.13 \times 10^8$     |
| $(NA)_4(MA)_3 \rightarrow (NA)_3(MA)_2 + (NA)(MA)$     | $2.27 \times 10^2$     |
| $(NA)_4(MA)_3 \rightarrow (NA)_3(MA) + (NA)(MA)_2$     | $3.36 \times 10^{-10}$ |
| $(NA)_4(MA)_3 \rightarrow (NA)_3 + (NA)(MA)_3$         | $3.81 \times 10^{-19}$ |
| $(NA)_4(MA)_3 \rightarrow (NA)_2(MA)_3 + (NA)_2$       | $4.07 \times 10^{-1}$  |
| $(NA)_4(MA)_3 \rightarrow (NA)_2(MA)_2 + (NA)_2(MA)$   | 2.21                   |
| $(NA)_4(MA)_4 \rightarrow (NA)_4(MA)_3 + (MA)$         | $3.47 \times 10^{-7}$  |
| $(NA)_4(MA)_4 \rightarrow (NA)_4(MA)_2 + (MA)_2$       | $4.32 \times 10^{-19}$ |
| $(NA)_4(MA)_4 \rightarrow (NA)_4(MA) + (MA)_3$         | $3.69 \times 10^{-35}$ |
| $(NA)_4(MA)_4 \rightarrow (NA)_4 + (MA)_4$             | $2.60 \times 10^{-44}$ |
| $(NA)_4(MA)_4 \rightarrow (NA)_3(MA)_4 + (NA)$         | $9.02 \times 10^{-5}$  |
| $(NA)_4(MA)_4 \rightarrow (NA)_3(MA)_3 + (NA)(MA)$     | $2.57 \times 10^{-4}$  |
| $(NA)_4(MA)_4 \rightarrow (NA)_3(MA)_2 + (NA)(MA)_2$   | $8.05 \times 10^{-16}$ |
| $(NA)_4(MA)_4 \rightarrow (NA)_3(MA) + (NA)(MA)_3$     | $5.66 \times 10^{-26}$ |
| $(NA)_4(MA)_4 \rightarrow (NA)_3 + (NA)(MA)_4$         | $2.20 \times 10^{-36}$ |
| $(NA)_4(MA)_4 \rightarrow (NA)_2(MA)_4 + (NA)_2$       | $2.87 \times 10^{-15}$ |
| $(NA)_4(MA)_4 \rightarrow (NA)_2(MA)_3 + (NA)_2(MA)$   | $2.03 \times 10^{-13}$ |
| $(NA)_4(MA)_4 \rightarrow (NA)_2(MA)_2 + (NA)_2(MA)_2$ | $2.94 \times 10^{-6}$  |
| $(DMA)_2 \rightarrow (DMA) + (DMA)$                    | $7.77 \times 10^{13}$  |
| $(DMA)_3 \rightarrow (DMA)_2 + (DMA)$                  | $1.95 \times 10^{10}$  |
| $(DMA)_4 \rightarrow (DMA)_3 + (DMA)$                  | $2.10 \times 10^{12}$  |
| $(DMA)_4 \rightarrow (DMA)_2 + (DMA)_2$                | $1.10 \times 10^8$     |
| $(NA)(DMA) \rightarrow (NA) + (DMA)$                   | $7.23 \times 10^4$     |
| $(NA)(DMA)_2 \rightarrow (NA)(DMA) + (DMA)$            | $1.69 \times 10^9$     |
| $(NA)(DMA)_2 \rightarrow (NA) + (DMA)_2$               | $8.53 \times 10^{-1}$  |
| $(NA)(DMA)_3 \rightarrow (NA)(DMA)_2 + (DMA)$          | $7.31 \times 10^9$     |
| $(NA)(DMA)_3 \rightarrow (NA)(DMA) + (DMA)_2$          | $6.99 \times 10^4$     |
| $(NA)(DMA)_3 \rightarrow (NA) + (DMA)_3$               | $3.38 \times 10^{-1}$  |
| $(NA)(DMA)_4 \rightarrow (NA)(DMA)_3 + (DMA)$          | $4.17 \times 10^{10}$  |
| $(NA)(DMA)_4 \rightarrow (NA)(DMA)_2 + (DMA)_2$        | $1.49 \times 10^6$     |
| $(NA)(DMA)_4 \rightarrow (NA)(DMA) + (DMA)_3$          | $1.36 \times 10^5$     |

|                                                                                                   |                        |
|---------------------------------------------------------------------------------------------------|------------------------|
| $(\text{NA})(\text{DMA})_4 \rightarrow (\text{NA}) + (\text{DMA})_4$                              | $7.00 \times 10^{-3}$  |
| $(\text{NA})_2(\text{DMA}) \rightarrow (\text{NA})_2 + (\text{DMA})$                              | $1.01 \times 10^1$     |
| $(\text{NA})_2(\text{DMA}) \rightarrow (\text{NA})(\text{DMA}) + (\text{NA})$                     | $5.53 \times 10^5$     |
| $(\text{NA})_2(\text{DMA})_2 \rightarrow (\text{NA})_2(\text{DMA}) + (\text{DMA})$                | $7.24 \times 10^{-5}$  |
| $(\text{NA})_2(\text{DMA})_2 \rightarrow (\text{NA})_2 + (\text{DMA})_2$                          | $4.37 \times 10^{-18}$ |
| $(\text{NA})_2(\text{DMA})_2 \rightarrow (\text{NA})(\text{DMA})_2 + (\text{NA})$                 | $2.51 \times 10^{-8}$  |
| $(\text{NA})_2(\text{DMA})_2 \rightarrow (\text{NA})(\text{DMA}) + (\text{NA})(\text{DMA})$       | $2.38 \times 10^{-4}$  |
| $(\text{NA})_2(\text{DMA})_3 \rightarrow (\text{NA})_2(\text{DMA})_2 + (\text{DMA})$              | $1.33 \times 10^{11}$  |
| $(\text{NA})_2(\text{DMA})_3 \rightarrow (\text{NA})_2(\text{DMA}) + (\text{DMA})_2$              | $4.90 \times 10^{-8}$  |
| $(\text{NA})_2(\text{DMA})_3 \rightarrow (\text{NA})_2 + (\text{DMA})_3$                          | $2.83 \times 10^{-17}$ |
| $(\text{NA})_2(\text{DMA})_3 \rightarrow (\text{NA})(\text{DMA})_3 + (\text{NA})$                 | $4.76 \times 10^{-7}$  |
| $(\text{NA})_2(\text{DMA})_3 \rightarrow (\text{NA})(\text{DMA})_2 + (\text{NA})(\text{DMA})$     | $3.37 \times 10^{-2}$  |
| $(\text{NA})_2(\text{DMA})_4 \rightarrow (\text{NA})_2(\text{DMA})_3 + (\text{DMA})$              | $6.49 \times 10^8$     |
| $(\text{NA})_2(\text{DMA})_4 \rightarrow (\text{NA})_2(\text{DMA})_2 + (\text{DMA})_2$            | $3.90 \times 10^5$     |
| $(\text{NA})_2(\text{DMA})_4 \rightarrow (\text{NA})_2(\text{DMA}) + (\text{DMA})_3$              | $1.38 \times 10^{-9}$  |
| $(\text{NA})_2(\text{DMA})_4 \rightarrow (\text{NA})_2 + (\text{DMA})_4$                          | $8.44 \times 10^{-21}$ |
| $(\text{NA})_2(\text{DMA})_4 \rightarrow (\text{NA})(\text{DMA})_4 + (\text{NA})$                 | $7.69 \times 10^{-9}$  |
| $(\text{NA})_2(\text{DMA})_4 \rightarrow (\text{NA})(\text{DMA})_3 + (\text{NA})(\text{DMA})$     | $2.77 \times 10^{-3}$  |
| $(\text{NA})_2(\text{DMA})_4 \rightarrow (\text{NA})(\text{DMA})_2 + (\text{NA})(\text{DMA})_2$   | $5.19 \times 10^{-3}$  |
| $(\text{NA})_3(\text{DMA}) \rightarrow (\text{NA})_3 + (\text{DMA})$                              | $1.49 \times 10^{-2}$  |
| $(\text{NA})_3(\text{DMA}) \rightarrow (\text{NA})_2(\text{DMA}) + (\text{NA})$                   | $3.19 \times 10^{10}$  |
| $(\text{NA})_3(\text{DMA}) \rightarrow (\text{NA})_2 + (\text{NA})(\text{DMA})$                   | $3.81 \times 10^6$     |
| $(\text{NA})_3(\text{DMA})_2 \rightarrow (\text{NA})_3(\text{DMA}) + (\text{DMA})$                | $2.53 \times 10^{-7}$  |
| $(\text{NA})_3(\text{DMA})_2 \rightarrow (\text{NA})_3 + (\text{DMA})_2$                          | $2.02 \times 10^{-23}$ |
| $(\text{NA})_3(\text{DMA})_2 \rightarrow (\text{NA})_2(\text{DMA})_2 + (\text{NA})$               | $1.17 \times 10^8$     |
| $(\text{NA})_3(\text{DMA})_2 \rightarrow (\text{NA})_2(\text{DMA}) + (\text{NA})(\text{DMA})$     | $8.56 \times 10^{-2}$  |
| $(\text{NA})_3(\text{DMA})_2 \rightarrow (\text{NA})_2 + (\text{NA})(\text{DMA})_2$               | $5.41 \times 10^{-10}$ |
| $(\text{NA})_3(\text{DMA})_3 \rightarrow (\text{NA})_3(\text{DMA})_2 + (\text{DMA})$              | $1.45 \times 10^1$     |
| $(\text{NA})_3(\text{DMA})_3 \rightarrow (\text{NA})_3(\text{DMA}) + (\text{DMA})_2$              | $1.73 \times 10^{-20}$ |
| $(\text{NA})_3(\text{DMA})_3 \rightarrow (\text{NA})_3 + (\text{DMA})_3$                          | $1.32 \times 10^{-32}$ |
| $(\text{NA})_3(\text{DMA})_3 \rightarrow (\text{NA})_2(\text{DMA})_3 + (\text{NA})$               | $1.33 \times 10^{-2}$  |
| $(\text{NA})_3(\text{DMA})_3 \rightarrow (\text{NA})_2(\text{DMA})_2 + (\text{NA})(\text{DMA})$   | $1.58 \times 10^4$     |
| $(\text{NA})_3(\text{DMA})_3 \rightarrow (\text{NA})_2(\text{DMA}) + (\text{NA})(\text{DMA})_2$   | $6.12 \times 10^{-10}$ |
| $(\text{NA})_3(\text{DMA})_3 \rightarrow (\text{NA})_2 + (\text{NA})(\text{DMA})_3$               | $1.03 \times 10^{-18}$ |
| $(\text{NA})_3(\text{DMA})_4 \rightarrow (\text{NA})_3(\text{DMA})_3 + (\text{DMA})$              | $3.92 \times 10^8$     |
| $(\text{NA})_3(\text{DMA})_4 \rightarrow (\text{NA})_3(\text{DMA})_2 + (\text{DMA})_2$            | $2.41 \times 10^{-5}$  |
| $(\text{NA})_3(\text{DMA})_4 \rightarrow (\text{NA})_3(\text{DMA}) + (\text{DMA})_3$              | $2.75 \times 10^{-22}$ |
| $(\text{NA})_3(\text{DMA})_4 \rightarrow (\text{NA})_3 + (\text{DMA})_4$                          | $2.22 \times 10^{-36}$ |
| $(\text{NA})_3(\text{DMA})_4 \rightarrow (\text{NA})_2(\text{DMA})_4 + (\text{NA})$               | $8.31 \times 10^{-3}$  |
| $(\text{NA})_3(\text{DMA})_4 \rightarrow (\text{NA})_2(\text{DMA})_3 + (\text{NA})(\text{DMA})$   | $4.37 \times 10^1$     |
| $(\text{NA})_3(\text{DMA})_4 \rightarrow (\text{NA})_2(\text{DMA})_2 + (\text{NA})(\text{DMA})_2$ | $2.75 \times 10^3$     |
| $(\text{NA})_3(\text{DMA})_4 \rightarrow (\text{NA})_2(\text{DMA}) + (\text{NA})(\text{DMA})_3$   | $2.84 \times 10^{-11}$ |
| $(\text{NA})_3(\text{DMA})_4 \rightarrow (\text{NA})_2 + (\text{NA})(\text{DMA})_4$               | $9.39 \times 10^{-21}$ |
| $(\text{NA})_4(\text{DMA}) \rightarrow (\text{NA})_4 + (\text{DMA})$                              | $8.21 \times 10^{-3}$  |

|                                                                                                     |                        |
|-----------------------------------------------------------------------------------------------------|------------------------|
| $(\text{NA})_4(\text{DMA}) \rightarrow (\text{NA})_3(\text{DMA}) + (\text{NA})$                     | $5.03 \times 10^8$     |
| $(\text{NA})_4(\text{DMA}) \rightarrow (\text{NA})_3 + (\text{NA})(\text{DMA})$                     | $7.93 \times 10^1$     |
| $(\text{NA})_4(\text{DMA}) \rightarrow (\text{NA})_2(\text{DMA}) + (\text{NA})_2$                   | $3.09 \times 10^9$     |
| $(\text{NA})_4(\text{DMA})_2 \rightarrow (\text{NA})_4(\text{DMA}) + (\text{DMA})$                  | $6.67 \times 10^{-8}$  |
| $(\text{NA})_4(\text{DMA})_2 \rightarrow (\text{NA})_4 + (\text{DMA})_2$                            | $2.68 \times 10^{-24}$ |
| $(\text{NA})_4(\text{DMA})_2 \rightarrow (\text{NA})_3(\text{DMA})_2 + (\text{NA})$                 | $1.38 \times 10^8$     |
| $(\text{NA})_4(\text{DMA})_2 \rightarrow (\text{NA})_3(\text{DMA}) + (\text{NA})(\text{DMA})$       | $3.25 \times 10^{-4}$  |
| $(\text{NA})_4(\text{DMA})_2 \rightarrow (\text{NA})_3 + (\text{NA})(\text{DMA})_2$                 | $2.71 \times 10^{-15}$ |
| $(\text{NA})_4(\text{DMA})_2 \rightarrow (\text{NA})_2(\text{DMA})_2 + (\text{NA})_2$               | $2.73 \times 10^6$     |
| $(\text{NA})_4(\text{DMA})_2 \rightarrow (\text{NA})_2(\text{DMA}) + (\text{NA})_2(\text{DMA})$     | $0.84 \times 10^1$     |
| $(\text{NA})_4(\text{DMA})_3 \rightarrow (\text{NA})_4(\text{DMA})_2 + (\text{DMA})$                | $6.94 \times 10^{-1}$  |
| $(\text{NA})_4(\text{DMA})_3 \rightarrow (\text{NA})_4(\text{DMA}) + (\text{DMA})_2$                | $2.03 \times 10^{-22}$ |
| $(\text{NA})_4(\text{DMA})_3 \rightarrow (\text{NA})_4 + (\text{DMA})_3$                            | $7.78 \times 10^{-35}$ |
| $(\text{NA})_4(\text{DMA})_3 \rightarrow (\text{NA})_3(\text{DMA})_3 + (\text{NA})$                 | $6.82 \times 10^6$     |
| $(\text{NA})_4(\text{DMA})_3 \rightarrow (\text{NA})_3(\text{DMA})_2 + (\text{NA})(\text{DMA})$     | $8.27 \times 10^2$     |
| $(\text{NA})_4(\text{DMA})_3 \rightarrow (\text{NA})_3(\text{DMA}) + (\text{NA})(\text{DMA})_2$     | $1.03 \times 10^{-13}$ |
| $(\text{NA})_4(\text{DMA})_3 \rightarrow (\text{NA})_3 + (\text{NA})(\text{DMA})_3$                 | $2.30 \times 10^{-25}$ |
| $(\text{NA})_4(\text{DMA})_3 \rightarrow (\text{NA})_2(\text{DMA})_3 + (\text{NA})_2$               | $1.38 \times 10^{-5}$  |
| $(\text{NA})_4(\text{DMA})_3 \rightarrow (\text{NA})_2(\text{DMA})_2 + (\text{NA})_2(\text{DMA})$   | $1.37 \times 10^5$     |
| $(\text{NA})_4(\text{DMA})_4 \rightarrow (\text{NA})_4(\text{DMA})_3 + (\text{DMA})$                | $5.88 \times 10^{-6}$  |
| $(\text{NA})_4(\text{DMA})_4 \rightarrow (\text{NA})_4(\text{DMA})_2 + (\text{DMA})_2$              | $1.63 \times 10^{-20}$ |
| $(\text{NA})_4(\text{DMA})_4 \rightarrow (\text{NA})_4(\text{DMA}) + (\text{DMA})_3$                | $4.57 \times 10^{-38}$ |
| $(\text{NA})_4(\text{DMA})_4 \rightarrow (\text{NA})_4 + (\text{DMA})_4$                            | $1.86 \times 10^{-52}$ |
| $(\text{NA})_4(\text{DMA})_4 \rightarrow (\text{NA})_3(\text{DMA})_4 + (\text{NA})$                 | $1.05 \times 10^{-7}$  |
| $(\text{NA})_4(\text{DMA})_4 \rightarrow (\text{NA})_3(\text{DMA})_3 + (\text{NA})(\text{DMA})$     | $3.16 \times 10^{-4}$  |
| $(\text{NA})_4(\text{DMA})_4 \rightarrow (\text{NA})_3(\text{DMA})_2 + (\text{NA})(\text{DMA})_2$   | $2.04 \times 10^{-12}$ |
| $(\text{NA})_4(\text{DMA})_4 \rightarrow (\text{NA})_3(\text{DMA}) + (\text{NA})(\text{DMA})_3$     | $6.80 \times 10^{-29}$ |
| $(\text{NA})_4(\text{DMA})_4 \rightarrow (\text{NA})_3 + (\text{NA})(\text{DMA})_4$                 | $2.96 \times 10^{-41}$ |
| $(\text{NA})_4(\text{DMA})_4 \rightarrow (\text{NA})_2(\text{DMA})_4 + (\text{NA})_2$               | $1.21 \times 10^{-19}$ |
| $(\text{NA})_4(\text{DMA})_4 \rightarrow (\text{NA})_2(\text{DMA})_3 + (\text{NA})_2(\text{DMA})$   | $5.38 \times 10^{-12}$ |
| $(\text{NA})_4(\text{DMA})_4 \rightarrow (\text{NA})_2(\text{DMA})_2 + (\text{NA})_2(\text{DMA})_2$ | $4.38 \times 10^3$     |

282

283 **Table S5.** Calculated Gibbs free energy of stepwise hydration for  $(\text{NA})_m(\text{R}_1\text{NHR}_2)_n$  ( $0 \leq m, n \leq 2$ )

284 at the DLPNO-CCSD(T)/aug-cc-pVTZ//M06-2X/6-31++G(d,p) level of theory, and 298.15 K and

285 1 atm.

| Cluster                         | n (H <sub>2</sub> O) |       |       |       |       |       |       |       |
|---------------------------------|----------------------|-------|-------|-------|-------|-------|-------|-------|
|                                 | n = 1                | n = 2 | n = 3 | n = 4 | n = 5 | n = 6 | n = 7 | n = 8 |
| NA                              | -2.45                | -2.39 | -1.73 |       |       |       |       |       |
| (NA) <sub>2</sub>               | -1.19                | -2.49 | -1.11 |       |       |       |       |       |
| NH <sub>3</sub>                 | -0.11                | -1.84 | -3.12 |       |       |       |       |       |
| (NH <sub>3</sub> ) <sub>2</sub> | -2.11                | -2.05 | -1.48 |       |       |       |       |       |
| (NA)(NH <sub>3</sub> )          | 0.01                 | -1.51 | -2.64 | -9.02 | -2.65 |       |       |       |

|                                                   |       |       |       |       |       |       |       |      |
|---------------------------------------------------|-------|-------|-------|-------|-------|-------|-------|------|
| (NA)(NH <sub>3</sub> ) <sub>2</sub>               | 0.05  | -3.04 | -2.86 | -5.51 | -0.05 |       |       |      |
| (NA) <sub>2</sub> (NH <sub>3</sub> )              | -3.69 | -3.66 | -7.48 | -0.21 | -2.41 |       |       |      |
| (NA) <sub>2</sub> (NH <sub>3</sub> ) <sub>2</sub> | -4.46 | -4.15 | -3.91 | -7.8  | -4.86 | -2.18 | -5.11 | 0.29 |
| MA                                                | -0.21 | -1.43 | -1.86 | -0.88 |       |       |       |      |
| (MA) <sub>2</sub>                                 | -2.66 | -1.32 | -1.86 | 1.46  |       |       |       |      |
| (NA)(MA)                                          | -0.59 | -3.26 | -6.01 | -6.37 | -5.93 | -2.13 | -1.54 |      |
| (NA)(MA) <sub>2</sub>                             | -4.23 | -5.24 | -4.8  | 0.22  |       |       |       |      |
| (NA) <sub>2</sub> (MA)                            | -4.20 | -1.66 | -7.75 | 0.86  |       |       |       |      |
| (NA) <sub>2</sub> (MA) <sub>2</sub>               | -5.97 | -3.01 | -6.21 | 2.58  |       |       |       |      |
| DMA                                               | -0.41 | -1.07 | -2.77 | -1.59 |       |       |       |      |
| (DMA) <sub>2</sub>                                | -2.32 | -3.81 | -3.81 | -1.51 |       |       |       |      |
| (NA)(DMA)                                         | -2.81 | -5.47 | -5.19 | 5.96  |       |       |       |      |
| (NA)(DMA) <sub>2</sub>                            | -4.64 | -5.29 | -5.4  | 1.66  |       |       |       |      |
| (NA) <sub>2</sub> (DMA)                           | -1.41 | -5.41 | -2.51 | -2.07 | -6.19 | -2.21 | -0.87 |      |
| (NA) <sub>2</sub> (DMA) <sub>2</sub>              | -1.24 | -1.66 | -4.8  | 2.78  |       |       |       |      |

286

287 **Table S6.** Thermodynamical quantities  $\Delta H$  (kcal/mol) and  $\Delta S$  (cal/(mol·K)) of stepwise hydration

288 for (NA)<sub>m</sub>(R<sub>1</sub>NHR<sub>2</sub>)<sub>n</sub>(W)<sub>x</sub> (x = 1 ~ 8) clusters under study at 298.15 K and 1 atm.

| Cluster                                              | $\Delta H$ | $\Delta S$ |
|------------------------------------------------------|------------|------------|
| (NA)(W)                                              | -11.21     | -31.5      |
| (NA)(W) <sub>2</sub>                                 | -22.62     | -63.9      |
| (NA)(W) <sub>3</sub>                                 | -33.39     | -96.4      |
| (NA) <sub>2</sub> (W)                                | -20.00     | -66.4      |
| (NA) <sub>2</sub> (W) <sub>2</sub>                   | -32.48     | -102.3     |
| (NA) <sub>2</sub> (W) <sub>3</sub>                   | -44.87     | -142.9     |
| (NH <sub>3</sub> )(W)                                | -7.67      | -27.2      |
| (NH <sub>3</sub> )(W) <sub>2</sub>                   | -18.79     | -60.5      |
| (NH <sub>3</sub> )(W) <sub>3</sub>                   | -31.24     | -94.1      |
| (NH <sub>3</sub> ) <sub>2</sub> (W)                  | -16.30     | -59.4      |
| (NH <sub>3</sub> ) <sub>2</sub> (W) <sub>2</sub>     | -27.56     | -90.9      |
| (NH <sub>3</sub> ) <sub>2</sub> (W) <sub>3</sub>     | -39.56     | -128.7     |
| (NA)(NH <sub>3</sub> )(W)                            | -25.17     | -64.7      |
| (NA)(NH <sub>3</sub> )(W) <sub>2</sub>               | -37.01     | -101.8     |
| (NA)(NH <sub>3</sub> )(W) <sub>3</sub>               | -48.93     | -135.2     |
| (NA)(NH <sub>3</sub> )(W) <sub>4</sub>               | -68.18     | -172.0     |
| (NA)(NH <sub>3</sub> )(W) <sub>5</sub>               | -75.87     | -209.2     |
| (NA)(NH <sub>3</sub> ) <sub>2</sub> (W)              | -36.39     | -105.4     |
| (NA)(NH <sub>3</sub> ) <sub>2</sub> (W) <sub>2</sub> | -49.31     | -140.9     |
| (NA)(NH <sub>3</sub> ) <sub>2</sub> (W) <sub>3</sub> | -60.71     | -171.6     |
| (NA)(NH <sub>3</sub> ) <sub>2</sub> (W) <sub>4</sub> | -76.80     | -209.6     |
| (NA)(NH <sub>3</sub> ) <sub>2</sub> (W) <sub>5</sub> | -87.60     | -248.3     |
| (NA) <sub>2</sub> (NH <sub>3</sub> )(W)              | -40.24     | -107.3     |

|                                                                    |         |        |
|--------------------------------------------------------------------|---------|--------|
| (NA) <sub>2</sub> (NH <sub>3</sub> )(W) <sub>2</sub>               | -53.49  | -141.8 |
| (NA) <sub>2</sub> (NH <sub>3</sub> )(W) <sub>3</sub>               | -71.93  | -181.2 |
| (NA) <sub>2</sub> (NH <sub>3</sub> )(W) <sub>4</sub>               | -82.14  | -217.1 |
| (NA) <sub>2</sub> (NH <sub>3</sub> )(W) <sub>5</sub>               | -95.93  | -258.1 |
| (NA) <sub>2</sub> (NH <sub>3</sub> ) <sub>2</sub> (W)              | -62.64  | -145.1 |
| (NA) <sub>2</sub> (NH <sub>3</sub> ) <sub>2</sub> (W) <sub>2</sub> | -76.31  | -179.3 |
| (NA) <sub>2</sub> (NH <sub>3</sub> ) <sub>2</sub> (W) <sub>3</sub> | -90.29  | -215.5 |
| (NA) <sub>2</sub> (NH <sub>3</sub> ) <sub>2</sub> (W) <sub>4</sub> | -108.95 | -254.6 |
| (NA) <sub>2</sub> (NH <sub>3</sub> ) <sub>2</sub> (W) <sub>5</sub> | -123.29 | -288.7 |
| (NA) <sub>2</sub> (NH <sub>3</sub> ) <sub>2</sub> (W) <sub>6</sub> | -133.23 | -316.6 |
| (NA) <sub>2</sub> (NH <sub>3</sub> ) <sub>2</sub> (W) <sub>7</sub> | -147.68 | -350.2 |
| (NA) <sub>2</sub> (NH <sub>3</sub> ) <sub>2</sub> (W) <sub>8</sub> | -160.59 | -397.7 |
| (MA)(W)                                                            | -8.18   | -28.7  |
| (MA)(W) <sub>2</sub>                                               | -18.95  | -61.5  |
| (MA)(W) <sub>3</sub>                                               | -31.35  | -95.7  |
| (MA) <sub>2</sub> (W)                                              | -16.51  | -63.4  |
| (MA) <sub>2</sub> (W) <sub>2</sub>                                 | -28.57  | -93.9  |
| (MA) <sub>2</sub> (W) <sub>3</sub>                                 | -41.24  | -132.8 |
| (NA)(MA)(W)                                                        | -27.90  | -67.8  |
| (NA)(MA)(W) <sub>2</sub>                                           | -42.22  | -107.5 |
| (NA)(MA)(W) <sub>3</sub>                                           | -56.78  | -138.3 |
| (NA)(MA)(W) <sub>4</sub>                                           | -72.44  | -171.7 |
| (NA)(MA)(W) <sub>5</sub>                                           | -88.53  | -208.2 |
| (NA)(MA)(W) <sub>6</sub>                                           | -100.56 | -243.8 |
| (NA)(MA)(W) <sub>7</sub>                                           | -112.26 | -280.3 |
| (NA)(MA) <sub>2</sub> (W)                                          | -42.29  | -107.7 |
| (NA)(MA) <sub>2</sub> (W) <sub>2</sub>                             | -57.08  | -141.8 |
| (NA)(MA) <sub>2</sub> (W) <sub>3</sub>                             | -71.90  | -178.1 |
| (NA)(MA) <sub>2</sub> (W) <sub>4</sub>                             | -80.91  | -211.3 |
| (NA) <sub>2</sub> (MA)(W)                                          | -46.50  | -111.6 |
| (NA) <sub>2</sub> (MA)(W) <sub>2</sub>                             | -58.81  | -149.9 |
| (NA) <sub>2</sub> (MA)(W) <sub>3</sub>                             | -75.94  | -183.6 |
| (NA) <sub>2</sub> (MA)(W) <sub>4</sub>                             | -84.28  | -216.7 |
| (NA) <sub>2</sub> (MA) <sub>2</sub> (W)                            | -73.98  | -147.0 |
| (NA) <sub>2</sub> (MA) <sub>2</sub> (W) <sub>2</sub>               | -86.78  | -182.2 |
| (NA) <sub>2</sub> (MA) <sub>2</sub> (W) <sub>3</sub>               | -98.39  | -201.6 |
| (NA) <sub>2</sub> (MA) <sub>2</sub> (W) <sub>4</sub>               | -109.75 | -251.7 |
| (DMA)(W)                                                           | -8.43   | -28.8  |
| (DMA)(W) <sub>2</sub>                                              | -19.18  | -63.6  |
| (DMA)(W) <sub>3</sub>                                              | -30.61  | -94.8  |
| (DMA) <sub>2</sub> (W)                                             | -14.57  | -62.1  |
| (DMA) <sub>2</sub> (W) <sub>2</sub>                                | -28.06  | -97.0  |
| (DMA) <sub>2</sub> (W) <sub>3</sub>                                | -41.08  | -130.1 |
| (NA)(DMA)(W)                                                       | -30.72  | -67.7  |

|                                                       |         |        |
|-------------------------------------------------------|---------|--------|
| (NA)(DMA)(W) <sub>2</sub>                             | -45.69  | -101.8 |
| (NA)(DMA)(W) <sub>3</sub>                             | -60.75  | -137.3 |
| (NA)(DMA)(W) <sub>4</sub>                             | -63.97  | -170.3 |
| (NA)(DMA) <sub>2</sub> (W)                            | -45.32  | -104.9 |
| (NA)(DMA) <sub>2</sub> (W) <sub>2</sub>               | -60.47  | -140.4 |
| (NA)(DMA) <sub>2</sub> (W) <sub>3</sub>               | -75.72  | -175.8 |
| (NA)(DMA) <sub>2</sub> (W) <sub>4</sub>               | -84.12  | -211.9 |
| (NA) <sub>2</sub> (DMA)(W)                            | -49.67  | -111.8 |
| (NA) <sub>2</sub> (DMA)(W) <sub>2</sub>               | -64.47  | -145.6 |
| (NA) <sub>2</sub> (DMA)(W) <sub>3</sub>               | -77.61  | -183.8 |
| (NA) <sub>2</sub> (DMA)(W) <sub>4</sub>               | -88.27  | -214.7 |
| (NA) <sub>2</sub> (DMA)(W) <sub>5</sub>               | -105.14 | -253.0 |
| (NA) <sub>2</sub> (DMA)(W) <sub>6</sub>               | -118.30 | -292.4 |
| (NA) <sub>2</sub> (DMA)(W) <sub>7</sub>               | -126.24 | -317.9 |
| (NA) <sub>2</sub> (DMA) <sub>2</sub> (W)              | -79.68  | -150.9 |
| (NA) <sub>2</sub> (DMA) <sub>2</sub> (W) <sub>2</sub> | -90.43  | -183.6 |
| (NA) <sub>2</sub> (DMA) <sub>2</sub> (W) <sub>3</sub> | -104.80 | -218.1 |
| (NA) <sub>2</sub> (DMA) <sub>2</sub> (W) <sub>4</sub> | -112.51 | -255.8 |

---

289

## 290 References

- 291 1. Ortega, I. K.; Kupiainen, O.; Kurten, T.; Olenius, T.; Wilkman, O.; McGrath, M. J.; Loukonen, V.;  
292 Vehkamäki, H., From quantum chemical formation free energies to evaporation rates. *Atmos. Chem.*  
293 *Phys.* **2012**, *12* (1), 225-235.
- 294 2. Chapman, S.; Cowling, T. G., *The Mathematical Theory of Nonuniform Gases: An Account of the*  
295 *Kinetic Theory of Viscosity, Thermal Conduction and Diffusion in Gases*. Cambridge University Press:  
296 **1970**.
- 297 3. Bader, R. F. W., *Atoms in Molecules: A Quantum Theory*. Oxford University Press: Oxford, UK,  
298 **1990**.
- 299 4. Duarte, D. J. R.; Sosa, G. L.; Peruchena, N. M., Nature of halogen bonding. A study based on the  
300 topological analysis of the Laplacian of the electron charge density and an energy decomposition  
301 analysis. *Journal of Molecular Modeling* **2013**, *19* (5), 2035-2041.
- 302 5. Huang, R.; Du, R.; Liu, G.; Zhao, X.; Ye, S.; Wu, G., A combined experimental and theoretical  
303 approach to the study of hydrogen bond interaction in the binary mixture of N-methylimidazole with  
304 water. *The Journal of Chemical Thermodynamics* **2012**, *55*, 60-66.
- 305 6. Zeng, Y.; Zhang, X.; Li, X.; Zheng, S.; Meng, L., Ab initio and AIM studies on typical  $\pi$ -type and  
306 pseudo- $\pi$ -type halogen bonds: Comparison with hydrogen bonds. *International Journal of Quantum*  
307 *Chemistry* **2011**, *111* (14), 3725-3740.
- 308 7. Johnson, E. R.; Keinan, S.; Mori-Sánchez, P.; Contreras-García, J.; Cohen, A. J.; Yang, W.,  
309 Revealing Noncovalent Interactions. *Journal of the American Chemical Society* **2010**, *132* (18), 6498-  
310 6506.
- 311 8. Amezcaga, N. J. M.; Pamies, S. C.; Peruchena, N. M.; Sosa, G. L., Halogen Bonding: A Study  
312 based on the Electronic Charge Density. *The Journal of Physical Chemistry A* **2010**, *114* (1), 552-562.
- 313 9. Politzer, P.; Murray, J. S.; Clark, T., Halogen bonding: an electrostatically-driven highly

- 314 directional noncovalent interaction. *Phys. Chem. Chem. Phys.* **2010**, *12* (28), 7748-7757.
- 315 10. Bone, R. G. A.; Bader, R. F. W., Identifying and Analyzing Intermolecular Bonding Interactions  
316 in van der Waals Molecules. *The Journal of Physical Chemistry* **1996**, *100* (26), 10892-10911.
- 317 11. Cremer, D.; Kraka, E., Chemical Bonds without Bonding Electron Density — Does the  
318 Difference Electron-Density Analysis Suffice for a Description of the Chemical Bond? *Angewandte*  
319 *Chemie International Edition in English* **1984**, *23* (8), 627-628.
- 320 12. Lu, T.; Chen, F., <http://sobereva.com/multiwfn/>. *J. Comput. Chem.* **2012**, *33*, 580-592.
- 321 13. Humphrey, W.; Dalke, A.; Schulten, K., VMD: Visual molecular dynamics. *Journal of Molecular*  
322 *Graphics* **1996**, *14* (1), 33-38.
- 323 14. Foster, J. P.; Weinhold, F., Natural hybrid orbitals. *J. Am. Chem. Soc.* **1980**, *102* (24), 7211-7218.
- 324 15. Reed, A. E.; Weinhold, F., Natural bond orbital analysis of near-Hartree-Fock water dimer. *J.*  
325 *Chem. Phys.* **1983**, *78* (6), 4066-4073.
